# Supplementary material
Source: HighWire-hosted journal article supplement (https://oem.bmj.com/content/oemed-2018-105667)
Supplement: inline-supplementary-material-1 [file inline-supplementary-material-1.pdf]

**Dermatitis among workers in Ontario: Results from the Occupational Disease Surveillance System**

Shakik S<sup>1,2</sup>, Arrandale VH<sup>1,2</sup>, Holness DL<sup>1,3,4</sup>, MacLeod J<sup>2</sup>, McLeod CB<sup>5</sup>, Peter A<sup>6</sup>, Demers PA<sup>1,2</sup>

Online Supplementary Tables

Table A1. Hazard Ratios for Dermatitis Among Industry Groups

| Industry Group*                                   | Overall         |                          | Male            |                          | Female          |                          |
|---------------------------------------------------|-----------------|--------------------------|-----------------|--------------------------|-----------------|--------------------------|
|                                                   | Cases (Workers) | HR <sup>†</sup> (95% CI) | Cases (Workers) | HR <sup>‡</sup> (95% CI) | Cases (Workers) | HR <sup>‡</sup> (95% CI) |
| <b>[1] Agriculture</b>                            | 224 (7,959)     | 0.78 (0.69, 0.89)        | 141 (5,900)     | 0.75 (0.63, 0.88)        | 83 (2,059)      | 0.86 (0.69, 1.06)        |
| <i>[01] Experimental and Institutional Farms</i>  | 224 (7,959)     | 0.78 (0.69, 0.89)        | 141 (5,900)     | 0.75 (0.63, 0.88)        | 83 (2,059)      | 0.86 (0.69, 1.06)        |
| [011] Livestock and Livestock Combination Farms   | 34 (1,318)      | 0.72 (0.51, 1.00)        | 19 (963)        | 0.62 (0.40, 0.97)        | 15 (355)        | 0.89 (0.54, 1.48)        |
| [013] Field Crop and Field Crop Combination Farms | 16 (714)        | 0.67 (0.41, 1.08)        | 11 (628)        | 0.55 (0.31, 1.00)        | 5 (86)          | 1.27 (0.53, 3.05)        |
| [015] Fruit and Vegetable Farms                   | 37 (1,500)      | 0.70 (0.51, 0.97)        | 28 (1,195)      | 0.73 (0.51, 1.06)        | 9 (305)         | 0.63 (0.33, 1.21)        |
| [017] Other Crop and Livestock Combinations Farms | 17 (882)        | 0.54 (0.34, 0.87)        | 12 (693)        | 0.53 (0.30, 0.94)        | 5 (189)         | 0.56 (0.24, 1.35)        |
| [019] Miscellaneous Specialty Farms               | 81 (2,348)      | 0.91 (0.73, 1.13)        | 39 (1,441)      | 0.84 (0.62, 1.16)        | 42 (907)        | 0.99 (0.73, 1.34)        |
| [021] Services Incidental to Agriculture          | 39 (1,197)      | 0.96 (0.70, 1.31)        | 32 (980)        | 1.06 (0.75, 1.50)        | 7 (217)         | 0.68 (0.33, 1.43)        |
| <b>[2] Forestry</b>                               | 33 (1,377)      | 0.71 (0.50, 1.00)        | 27 (1,235)      | 0.67 (0.46, 0.98)        | 6 (142)         | 0.90 (0.41, 2.00)        |
| <i>[04] Forestry</i>                              | 28 (1,302)      | 0.64 (0.44, 0.92)        | 22 (1,162)      | 0.58 (0.39, 0.89)        | 6 (140)         | 0.91 (0.41, 2.02)        |
| [031] Logging                                     | 26 (1,172)      | 0.66 (0.45, 0.96)        | 20 (1,063)      | 0.58 (0.37, 0.89)        | 6 (109)         | 1.18 (0.53, 2.62)        |
| [039] Forestry Services                           | <5 (130)        | -                        | -               | -                        | -               | -                        |
| <i>[06] Fishing and Trapping</i>                  | 5 (75)          | 2.11 (0.88, 5.03)        | 5 (73)          | 2.15 (0.90, 5.17)        | 0 (2)           | -                        |
| [041] Fishing                                     | <5 (64)         | -                        | -               | -                        | -               | -                        |
| [045] Fishery Services                            | <5 (11)         | -                        | -               | -                        | -               | -                        |
| <b>[4] Mines, Quarries and Oil Wells</b>          | 83 (3,025)      | 0.83 (0.67, 1.02)        | 77 (2,915)      | 0.80 (0.64, 1.00)        | 6 (110)         | 1.19 (0.54, 2.63)        |
| <i>[09] Metal Mines</i>                           | 37 (1,357)      | 0.81 (0.59, 1.12)        | -               | -                        | -               | -                        |
| [051] Placer Gold Mines                           | <5 (48)         | -                        | -               | -                        | -               | -                        |
| [052] Gold Quartz Mines                           | <5 (142)        | -                        | -               | -                        | -               | -                        |
| [057] Uranium Mines                               | <5 (29)         | -                        | -               | -                        | -               | -                        |
| [059] Miscellaneous Metal Mines                   | 31 (1,138)      | 0.81 (0.57, 1.15)        | -               | -                        | -               | -                        |
| <i>[10] Non Metal Mines</i>                       | 6 (143)         | 1.28 (0.58, 2.85)        | 6 (137)         | 1.35 (0.61, 3.00)        | 0 (6)           | -                        |
| [064] Crude Petroleum and Natural Gas Industry    | 0 (14)          | -                        | -               | -                        | -               | -                        |
| [071] Asbestos Mines                              | <5 (9)          | -                        | -               | -                        | -               | -                        |
| [073] Gypsum Mines                                | <5 (15)         | -                        | -               | -                        | -               | -                        |
| [079] Miscellaneous Non Metal Mines               | <5 (104)        | -                        | -               | -                        | -               | -                        |

Table A1. Hazard Ratios for Dermatitis Among Industry Groups

| Industry Group*                                     | Overall         |                          | Male            |                          | Female          |                          |
|-----------------------------------------------------|-----------------|--------------------------|-----------------|--------------------------|-----------------|--------------------------|
|                                                     | Cases (Workers) | HR <sup>†</sup> (95% CI) | Cases (Workers) | HR <sup>‡</sup> (95% CI) | Cases (Workers) | HR <sup>‡</sup> (95% CI) |
| <i>[12] Quarries and Sand Pits</i>                  | 24 (796)        | 0.91 (0.61, 1.36)        | -               | -                        | -               | -                        |
| [083] Stone Quarries                                | 14 (356)        | 1.21 (0.72, 2.05)        | -               | -                        | -               | -                        |
| [087] Sand Pits or Quarries                         | 10 (440)        | 0.68 (0.37, 1.27)        | 10 (419)        | 0.73 (0.39, 1.35)        | 0 (21)          | -                        |
| <i>[13] Services Incidental to Mining</i>           | 16 (729)        | 0.67 (0.41, 1.09)        | -               | -                        | -               | -                        |
| [096] Contract Drilling for Petroleum               | <5 (23)         | -                        | -               | -                        | -               | -                        |
| [098] Other Contract Drilling                       | 0 (141)         | -                        | -               | -                        | -               | -                        |
| [099] Miscellaneous Services Incidental to Mining   | 15 (565)        | 0.80 (0.48, 1.33)        | -               | -                        | -               | -                        |
| <b>[5] Manufacturing Industries</b>                 | 4,404 (112,487) | <b>1.10 (1.06, 1.14)</b> | 2,972 (84,433)  | <b>1.10 (1.06, 1.15)</b> | 1,432 (28,054)  | <b>1.10 (1.04, 1.16)</b> |
| <i>[14] Food and Beverage Industries</i>            | 613 (14,586)    | <b>1.12 (1.03, 1.21)</b> | 333 (9,342)     | 1.10 (0.99, 1.23)        | 279 (5,244)     | <b>1.14 (1.01, 1.28)</b> |
| [101] Meat and Poultry Products                     | 178 (4,496)     | 1.05 (0.90, 1.21)        | 98 (2,854)      | 1.07 (0.87, 1.30)        | 80 (1,642)      | 1.03 (0.83, 1.28)        |
| [102] Fish Products                                 | 9 (177)         | 1.27 (0.66, 2.43)        | -               | -                        | -               | -                        |
| [103] Fruit and Vegetable Processing                | 63 (1,278)      | <b>1.31 (1.02, 1.67)</b> | 34 (801)        | 1.32 (0.94, 1.84)        | 29 (477)        | 1.30 (0.90, 1.87)        |
| [104] Dairy Products                                | 35 (934)        | 1.01 (0.72, 1.40)        | 21 (623)        | 1.05 (0.68, 1.60)        | 14 (311)        | 0.96 (0.57, 1.62)        |
| [105] Flour and Breakfast Cereal Products           | 9 (383)         | 0.66 (0.34, 1.26)        | -               | -                        | -               | -                        |
| [106] Feed                                          | 9 (347)         | 0.76 (0.40, 1.46)        | -               | -                        | -               | -                        |
| [107] Bakery Products                               | 124 (2,343)     | <b>1.35 (1.14, 1.62)</b> | 58 (1,231)      | <b>1.45 (1.12, 1.88)</b> | 66 (1,112)      | <b>1.28 (1.00, 1.63)</b> |
| [108] Miscellaneous Food                            | 113 (2,839)     | 1.04 (0.86, 1.25)        | 57 (1,718)      | 1.01 (0.78, 1.31)        | 56 (1,121)      | 1.07 (0.82, 1.39)        |
| [109] Beverage                                      | 72 (1,790)      | 1.14 (0.90, 1.44)        | 47 (1,414)      | 1.03 (0.78, 1.38)        | 25 (376)        | 1.43 (0.97, 2.11)        |
| <i>[15] Tobacco Products Industries</i>             | <5 (158)        | -                        | -               | -                        | -               | -                        |
| [151] Leaf Tobacco Processors                       | 0 (15)          | -                        | -               | -                        | -               | -                        |
| [153] Tobacco Products Manufacturers                | <5 (143)        | -                        | -               | -                        | -               | -                        |
| <i>[16] Rubber and Plastics Products Industries</i> | 334 (7,755)     | <b>1.15 (1.03, 1.28)</b> | 193 (5,071)     | <b>1.17 (1.01, 1.35)</b> | 141 (2,684)     | 1.12 (0.95, 1.32)        |
| [162] Rubber Products                               | 44 (1,245)      | 0.97 (0.72, 1.30)        | 29 (898)        | 0.99 (0.69, 1.43)        | 15 (347)        | 0.93 (0.56, 1.54)        |
| [165] Plastics Fabricating                          | 290 (6,510)     | <b>1.18 (1.05, 1.32)</b> | 164 (4,173)     | <b>1.21 (1.03, 1.41)</b> | 126 (2,337)     | 1.15 (0.96, 1.37)        |
| <i>[17] Leather Industries</i>                      | 10 (337)        | 0.70 (0.38, 1.30)        | -               | -                        | -               | -                        |
| [172] Leather Tanneries                             | 6 (119)         | 1.21 (0.55, 2.70)        | 0 (47)          | -                        | 6 (72)          | 1.79 (0.80, 3.98)        |
| [174] Shoe Factories                                | <5 (70)         | -                        | -               | -                        | -               | -                        |
| [175] Leather Glove Factories                       | <5 (27)         | -                        | -               | -                        | -               | -                        |

Table A1. Hazard Ratios for Dermatitis Among Industry Groups

| Industry Group*                                              | Overall         |                          | Male            |                          | Female          |                   |
|--------------------------------------------------------------|-----------------|--------------------------|-----------------|--------------------------|-----------------|-------------------|
|                                                              | Cases (Workers) | HR† (95% CI)             | Cases (Workers) | HR‡ (95% CI)             | Cases (Workers) | HR‡ (95% CI)      |
| [179] Luggage, Handbag and Small Leather Goods Manufacturers | <5 (121)        | -                        | -               | -                        | -               | -                 |
| <i>[18] Textile Industries</i>                               | 85 (2,053)      | 1.04 (0.84, 1.29)        | 34 (1,072)      | 0.96 (0.69, 1.35)        | 51 (981)        | 1.11 (0.84, 1.46) |
| [181] Cotton Yarn and Cloth Mills                            | <5 (77)         | -                        | -               | -                        | -               | -                 |
| [182] Wool Yarn and Cloth Mills                              | 22 (438)        | 1.22 (0.81, 1.86)        | 7 (177)         | 1.22 (0.58, 2.56)        | 15 (261)        | 1.24 (0.75, 2.05) |
| [183] Man-made Fibre, Yarn and Cloth Mills                   | <5 (196)        | -                        | -               | -                        | -               | -                 |
| [184] Cordage and Twine                                      | <5 (54)         | -                        | -               | -                        | -               | -                 |
| [185] Felt and Fibre Processing                              | <5 (49)         | -                        | -               | -                        | -               | -                 |
| [186] Carpet, Mat and Rug                                    | 12 (221)        | 1.45 (0.82, 2.55)        | -               | -                        | -               | -                 |
| [187] Canvas Products, and Cotton and Jute Bags              | 6 (186)         | 0.84 (0.38, 1.88)        | -               | -                        | -               | -                 |
| [188] Automobile Fabric Accessories                          | 12 (203)        | 1.46 (0.83, 2.56)        | -               | -                        | -               | -                 |
| [189] Miscellaneous Textile                                  | 25 (629)        | 0.98 (0.67, 1.46)        | 11 (308)        | 1.09 (0.60, 1.96)        | 14 (321)        | 0.93 (0.55, 1.57) |
| <i>[19] Knitting Mills</i>                                   | 6 (147)         | 0.93 (0.42, 2.07)        | -               | -                        | -               | -                 |
| [231] Hosiery Mills                                          | <5 (82)         | -                        | -               | -                        | -               | -                 |
| [239] Knitting Mills (except Hosiery)                        | <5 (65)         | -                        | -               | -                        | -               | -                 |
| <i>[20] Clothing Industries</i>                              | 38 (818)        | 1.11 (0.81, 1.52)        | -               | -                        | -               | -                 |
| [243] Men's Clothing                                         | 16 (407)        | 0.97 (0.59, 1.58)        | -               | -                        | -               | -                 |
| [244] Women's Clothing                                       | 9 (153)         | 1.38 (0.72, 2.65)        | 5 (206)         | 0.74 (0.31, 1.77)        | 6 (106)         | 1.22 (0.55, 2.72) |
| [245] Children's Clothing                                    | <5 (8)          | -                        | -               | -                        | -               | -                 |
| [249] Miscellaneous Clothing                                 | 12 (244)        | 1.12 (0.64, 1.98)        | -               | -                        | -               | -                 |
| <i>[21] Wood Industries</i>                                  | 246 (7,254)     | 0.99 (0.87, 1.12)        | 222 (6,729)     | 1.02 (0.89, 1.16)        | 62 (1,343)      | 0.98 (0.76, 1.26) |
| [251] Sawmills, Planing Mills and Shingle Mills              | 17 (1,325)      | 0.37 (0.23, 0.60)        | -               | -                        | -               | -                 |
| [252] Veneer and Plywood Mills                               | 10 (273)        | 0.99 (0.53, 1.84)        | -               | -                        | -               | -                 |
| [254] Sash, Door and Other Millwork Plants                   | 159 (3,966)     | <b>1.18 (1.01, 1.38)</b> | 136 (3,536)     | <b>1.20 (1.01, 1.42)</b> | 23 (430)        | 1.13 (0.75, 1.70) |
| [256] Wooden Box Factories                                   | 26 (735)        | 1.07 (0.73, 1.57)        | -               | -                        | -               | -                 |
| [258] Coffin and Casket                                      | <5 (31)         | -                        | -               | -                        | -               | -                 |
| [259] Miscellaneous Wood Industries                          | 33 (924)        | 1.02 (0.73, 1.44)        | -               | -                        | -               | -                 |
| <i>[22] Furniture and Fixture Industries</i>                 | 202 (4,719)     | <b>1.21 (1.06, 1.39)</b> | 153 (3,824)     | 1.23 (1.04, 1.44)        | 49 (895)        | 1.17 (0.88, 1.55) |

Table A1. Hazard Ratios for Dermatitis Among Industry Groups

| Industry Group*                                              | Overall         |                          | Male            |                          | Female          |                          |
|--------------------------------------------------------------|-----------------|--------------------------|-----------------|--------------------------|-----------------|--------------------------|
|                                                              | Cases (Workers) | HR <sup>†</sup> (95% CI) | Cases (Workers) | HR <sub>‡</sub> (95% CI) | Cases (Workers) | HR <sub>‡</sub> (95% CI) |
| [261] Household Furniture Manufacturers                      | 87 (2,248)      | 1.09 (0.88, 1.35)        | 68 (1,801)      | 1.16 (0.92, 1.47)        | 19 (447)        | 0.91 (0.58, 1.42)        |
| [264] Office Furniture Manufacturers                         | 70 (1,490)      | <b>1.34 (1.06, 1.69)</b> | 53 (1,235)      | <b>1.31 (1.00, 1.71)</b> | 17 (255)        | 1.43 (0.89, 2.29)        |
| [266] Miscellaneous Furniture and Fixtures Manufacturers     | 45 (971)        | 1.31 (0.98, 1.75)        | 32 (780)        | 1.25 (0.88, 1.77)        | 13 (191)        | 1.47 (0.85, 2.53)        |
| [268] Electric Lamp and Shade Manufacturers                  | <5 (10)         | -                        | -               | -                        | -               | -                        |
| [23] Paper and Allied Industries                             | 108 (3,000)     | 0.99 (0.82, 1.20)        | 69 (2,311)      | 0.90 (0.71, 1.13)        | 39 (689)        | 1.22 (0.89, 1.67)        |
| [271] Pulp and Paper Mills                                   | 11 (596)        | 0.53 (0.29, 0.96)        | -               | -                        | -               | -                        |
| [272] Asphalt Roofing Manufacturers                          | <5 (58)         | -                        | -               | -                        | -               | -                        |
| [273] Paper Box and Bag Manufacturers                        | 59 (1,324)      | 1.24 (0.96, 1.60)        | 38 (1,013)      | 1.15 (0.83, 1.57)        | 21 (311)        | 1.46 (0.95, 2.24)        |
| [274] Miscellaneous Paper Converters                         | 36 (1,022)      | 0.94 (0.68, 1.30)        | 20 (692)        | 0.88 (0.57, 1.36)        | 16 (330)        | 1.04 (0.64, 1.70)        |
| [24] Printing, Publishing and Allied Industries              | 182 (4,405)     | 1.08 (0.93, 1.25)        | 97 (2,748)      | 1.07 (0.88, 1.31)        | 85 (1,657)      | 1.10 (0.89, 1.36)        |
| [286] Commercial Printing                                    | 121 (2,862)     | 1.12 (0.94, 1.34)        | 72 (1,913)      | 1.14 (0.91, 1.44)        | 49 (949)        | 1.10 (0.83, 1.46)        |
| [287] Platemaking, Typesetting and Trade Bindery             | 8 (268)         | 0.75 (0.38, 1.50)        | -               | -                        | -               | -                        |
| [288] Publishing                                             | 21 (585)        | 0.90 (0.59, 1.38)        | 5 (304)         | 0.51 (0.21, 1.21)        | 16 (281)        | 1.22 (0.75, 1.99)        |
| [289] Publishing and Printing                                | 32 (690)        | 1.18 (0.84, 1.67)        | 14 (379)        | 1.12 (0.66, 1.89)        | 18 (311)        | 1.25 (0.79, 1.98)        |
| [25] Primary Metal Industries                                | 118 (4,181)     | 0.82 (0.68, 0.98)        | 102 (3,752)     | 0.81 (0.67, 0.99)        | 16 (429)        | 0.79 (0.48, 1.29)        |
| [291] Iron and Steel Mills                                   | 43 (1,553)      | 0.82 (0.61, 1.11)        | -               | -                        | -               | -                        |
| [292] Steel Pipe and Tube Mills                              | 12 (489)        | 0.72 (0.41, 1.26)        | -               | -                        | -               | -                        |
| [294] Iron Foundries                                         | 17 (468)        | 1.07 (0.66, 1.71)        | -               | -                        | -               | -                        |
| [295] Smelting and Refining                                  | <5 (29)         | -                        | -               | -                        | -               | -                        |
| [296] Aluminum Rolling, Casting and Extruding                | 16 (553)        | 0.83 (0.51, 1.35)        | -               | -                        | -               | -                        |
| [297] Copper and Copper Alloy Rolling, Casting and Extruding | 8 (168)         | 1.40 (0.70, 2.79)        | -               | -                        | -               | -                        |
| [298] Metal Rolling, Casting and Extruding n.e.s             | 21 (921)        | 0.64 (0.42, 0.98)        | 15 (749)        | 0.60 (0.36, 1.00)        | 6 (172)         | 0.74 (0.33, 1.66)        |
| [26] Metal Fabricating Industries                            | 851 (22,430)    | <b>1.10 (1.03, 1.18)</b> | 670 (19,086)    | <b>1.08 (1.00, 1.17)</b> | 181 (3,344)     | <b>1.16 (1.00, 1.34)</b> |
| [301] Boiler and Plate Works                                 | <5 (214)        | -                        | -               | -                        | -               | -                        |
| [302] Fabricated Structural Metal                            | 58 (1,563)      | 1.13 (0.87, 1.46)        | -               | -                        | -               | -                        |

Table A1. Hazard Ratios for Dermatitis Among Industry Groups

| Industry Group*                                               | Overall         |                          | Male            |                          | Female          |                          |
|---------------------------------------------------------------|-----------------|--------------------------|-----------------|--------------------------|-----------------|--------------------------|
|                                                               | Cases (Workers) | HR <sup>†</sup> (95% CI) | Cases (Workers) | HR <sup>‡</sup> (95% CI) | Cases (Workers) | HR <sup>‡</sup> (95% CI) |
| [303] Ornamental and Architectural Metal                      | 83 (2,353)      | 1.05 (0.85, 1.30)        | 75 (2,162)      | 1.08 (0.86, 1.35)        | 8 (191)         | 0.89 (0.45, 1.78)        |
| [304] Metal Stamping, Pressing and Coating                    | 165 (4,640)     | 1.02 (0.88, 1.19)        | 131 (3,928)     | 1.02 (0.86, 1.21)        | 34 (712)        | 1.02 (0.73, 1.42)        |
| [305] Wire and Wire Products Manufacturers                    | 63 (1,479)      | 1.17 (0.92, 1.50)        | 40 (1,105)      | 1.10 (0.81, 1.50)        | 23 (374)        | 1.32 (0.88, 1.99)        |
| [306] Hardware, Tool and Cutlery Manufacturers                | 163 (3,830)     | <b>1.22 (1.05, 1.43)</b> | 131 (3,156)     | <b>1.29 (1.09, 1.54)</b> | 32 (674)        | 1.01 (0.71, 1.43)        |
| [307] Heating Equipment Manufacturers                         | 12 (328)        | 1.03 (0.58, 1.81)        | -               | -                        | -               | -                        |
| [308] Machine Shops                                           | 125 (3,343)     | 1.12 (0.94, 1.34)        | 108 (3,097)     | 1.08 (0.89, 1.30)        | 17 (246)        | 1.48 (0.92, 2.38)        |
| [309] Miscellaneous Metal Fabricating Industries              | 178 (4,680)     | 1.07 (0.92, 1.24)        | 119 (3,663)     | 1.00 (0.84, 1.20)        | 59 (1,017)      | 1.25 (0.96, 1.61)        |
| <i>[27] Machinery Industries</i>                              | 241 (6,204)     | 1.13 (0.99, 1.28)        | 189 (5,325)     | 1.09 (0.95, 1.26)        | 52 (879)        | 1.26 (0.96, 1.66)        |
| [311] Agriculture and Implement                               | 24 (490)        | <b>1.49 (1.00, 2.23)</b> | -               | -                        | -               | -                        |
| [315] Miscellaneous Machinery and Equipment Manufacturers     | 191 (4,978)     | 1.11 (0.97, 1.28)        | 154 (4,306)     | 1.10 (0.94, 1.29)        | 37 (672)        | 1.17 (0.85, 1.62)        |
| [316] Commercial Refrigeration and Air Conditioning Equipment | 12 (348)        | 1.02 (0.58, 1.79)        | -               | -                        | -               | -                        |
| [318] Office and Store Machinery Manufacturers                | 14 (388)        | 0.94 (0.56, 1.58)        | -               | -                        | -               | -                        |
| <i>[28] Transportation Equipment Industries</i>               | 776 (19,138)    | <b>1.11 (1.03, 1.19)</b> | 535 (13,999)    | <b>1.17 (1.07, 1.28)</b> | 241 (5,139)     | 0.99 (0.87, 1.13)        |
| [321] Aircraft and Aircraft Parts Manufacturers               | 39 (855)        | 1.32 (0.96, 1.81)        | 34 (737)        | <b>1.41 (1.01, 1.98)</b> | 5 (118)         | 0.91 (0.38, 2.17)        |
| [323] Motor Vehicle Manufacturers                             | 174 (4,687)     | 1.04 (0.90, 1.21)        | 123 (3,693)     | 1.02 (0.85, 1.22)        | 51 (994)        | 1.10 (0.83, 1.44)        |
| [324] Truck Body and Trailer Manufacturers                    | 51 (1,589)      | 0.96 (0.73, 1.27)        | -               | -                        | -               | -                        |
| [325] Motor Vehicle Parts and Accessories Manufacturers       | 492 (11,417)    | <b>1.14 (1.05, 1.25)</b> | 313 (7,526)     | <b>1.27 (1.13, 1.42)</b> | 179 (3,891)     | 0.97 (0.84, 1.13)        |
| [326] Railroad Rolling Stock Industry                         | 10 (262)        | 1.13 (0.61, 2.11)        | -               | -                        | -               | -                        |
| [327] Shipbuilding and Repair                                 | <5 (101)        | -                        | -               | -                        | -               | -                        |
| [328] Boatbuilding and Repair                                 | 5 (175)         | 0.81 (0.34, 1.95)        | -               | -                        | -               | -                        |
| [329] Miscellaneous Vehicle Manufacturers                     | <5 (52)         | -                        | -               | -                        | -               | -                        |
| <i>[29] Electrical Products Industries</i>                    | 183 (4,438)     | 1.07 (0.93, 1.24)        | 94 (2,746)      | 1.03 (0.84, 1.26)        | 89 (1,692)      | 1.12 (0.91, 1.38)        |
| [331] Manufacturers of Small Electrical Appliances            | 23 (470)        | 1.19 (0.79, 1.79)        | 10 (190)        | 1.61 (0.87, 2.98)        | 13 (280)        | 0.98 (0.57, 1.69)        |

Table A1. Hazard Ratios for Dermatitis Among Industry Groups

| Industry Group*                                                 | Overall         |                   | Male            |                   | Female          |                   |
|-----------------------------------------------------------------|-----------------|-------------------|-----------------|-------------------|-----------------|-------------------|
|                                                                 | Cases (Workers) | HR† (95% CI)      | Cases (Workers) | HR‡ (95% CI)      | Cases (Workers) | HR‡ (95% CI)      |
| [332] Manufacturers of Major Appliances                         | 13 (436)        | 0.82 (0.48, 1.42) | 8 (331)         | 0.74 (0.37, 1.47) | 5 (105)         | 1.00 (0.42, 2.41) |
| [333] Manufacturers of Lighting Fixtures                        | 13 (258)        | 1.27 (0.74, 2.19) | -               | -                 | -               | -                 |
| [334] Manufacturers of Household Radio and Television Receivers | <5 (21)         | -                 | -               | -                 | -               | -                 |
| [335] Communications Equipment Manufacturers                    | 59 (1,422)      | 1.05 (0.81, 1.36) | 26 (792)        | 0.99 (0.67, 1.45) | 33 (630)        | 1.12 (0.80, 1.58) |
| [336] Manufacturers of Electrical Industrial Equipment          | <5 (996)        | -                 | 31 (828)        | 1.12 (0.79, 1.59) | 12 (211)        | 1.21 (0.69, 2.13) |
| [338] Manufacturers of Electric Wire and Cable                  | 6 (207)         | 0.80 (0.36, 1.77) | -               | -                 | -               | -                 |
| [339] Manufacturers of Miscellaneous Electrical Products        | 22 (587)        | 0.94 (0.62, 1.43) | 9 (299)         | 0.90 (0.47, 1.74) | 13 (288)        | 0.96 (0.56, 1.65) |
| <i>[30] Non-Metallic Mineral Products Industries</i>            | 102 (3,383)     | 0.90 (0.74, 1.09) | 87 (3,151)      | 0.85 (0.69, 1.04) | 15 (232)        | 1.38 (0.83, 2.30) |
| [351] Clay Products Manufacturers                               | <5 (172)        | -                 | -               | -                 | -               | -                 |
| [352] Cement Manufacturers                                      | <5 (145)        | -                 | -               | -                 | -               | -                 |
| [353] Stone Products Manufacturers                              | <5 (60)         | -                 | -               | -                 | -               | -                 |
| [354] Concrete Products Manufacturers                           | 34 (1,027)      | 1.01 (0.73, 1.42) | -               | -                 | -               | -                 |
| [355] Ready-Mix Concrete Manufacturers                          | 13 (546)        | 0.72 (0.42, 1.25) | -               | -                 | -               | -                 |
| [356] Glass and Glass Products Manufacturers                    | 22 (589)        | 1.06 (0.69, 1.60) | 15 (485)        | 0.94 (0.57, 1.57) | 7 (104)         | 1.44 (0.69, 3.01) |
| [357] Abrasives Manufacturers                                   | <5 (90)         | -                 | -               | -                 | -               | -                 |
| [358] Lime Manufacturers                                        | <5 (9)          | -                 | -               | -                 | -               | -                 |
| [359] Miscellaneous Non-Metallic Mineral Products Industries    | 24 (745)        | 0.98 (0.66, 1.46) | -               | -                 | -               | -                 |
| <i>[31] Petroleum and Coal Products Industries</i>              | 8 (189)         | 1.24 (0.62, 2.49) | -               | -                 | -               | -                 |
| [365] Petroleum Refineries                                      | <5 (117)        | -                 | -               | -                 | -               | -                 |
| [369] Miscellaneous Petroleum and Coal Products Industries      | <5 (72)         | -                 | -               | -                 | -               | -                 |
| <i>[32] Chemical and Chemical Products Industries</i>           | 157 (3,807)     | 1.10 (0.94, 1.29) | 96 (2,558)      | 1.13 (0.93, 1.39) | 61 (1,249)      | 1.04 (0.81, 1.34) |
| [372] Manufacturers of Mixed Fertilizers                        | <5 (112)        | -                 | -               | -                 | -               | -                 |

Table A1. Hazard Ratios for Dermatitis Among Industry Groups

| Industry Group*                                              | Overall         |                          | Male            |                          | Female          |                          |
|--------------------------------------------------------------|-----------------|--------------------------|-----------------|--------------------------|-----------------|--------------------------|
|                                                              | Cases (Workers) | HR <sup>†</sup> (95% CI) | Cases (Workers) | HR <sub>‡</sub> (95% CI) | Cases (Workers) | HR <sub>‡</sub> (95% CI) |
| [373] Manufacturers of Plastics and Synthetic Resins         | 7 (344)         | 0.59 (0.28, 1.23)        | -               | -                        | -               | -                        |
| [374] Manufacturers of Pharmaceuticals and Medicines         | 58 (1,169)      | 1.24 (0.96, 1.61)        | 33 (606)        | <b>1.64 (1.17, 2.31)</b> | 25 (563)        | 0.94 (0.64, 1.39)        |
| [375] Paint and Varnish Manufacturers                        | 9 (234)         | 1.11 (0.58, 2.13)        | -               | -                        | -               | -                        |
| [376] Manufacturers of Soap and Cleaning Compounds           | 10 (281)        | 0.93 (0.50, 1.72)        | -               | -                        | -               | -                        |
| [377] Manufacturers of Toilet Preparations                   | 24 (509)        | 1.15 (0.77, 1.71)        | 6 (206)         | 0.89 (0.40, 1.97)        | 18 (303)        | 1.28 (0.81, 2.03)        |
| [378] Manufacturers of Industrial Chemicals                  | 14 (362)        | 1.12 (0.66, 1.89)        | -               | -                        | -               | -                        |
| [379] Miscellaneous Chemical Industries                      | 34 (796)        | 1.21 (0.87, 1.70)        | 25 (654)        | 1.16 (0.79, 1.72)        | 9 (142)         | 1.35 (0.70, 2.60)        |
| <i>[33] Miscellaneous Manufacturing Industries</i>           | 143 (3,485)     | 1.09 (0.93, 1.29)        | 89 (2,300)      | 1.19 (0.96, 1.46)        | 54 (1,185)      | 0.97 (0.75, 1.27)        |
| [391] Scientific and Professional Equipment                  | 41 (873)        | 1.20 (0.88, 1.63)        | 20 (463)        | 1.33 (0.86, 2.07)        | 21 (410)        | 1.11 (0.72, 1.70)        |
| [392] Jewelry and Silverware                                 | 8 (160)         | 1.34 (0.67, 2.69)        | -               | -                        | -               | -                        |
| [393] Sporting Goods and Toy                                 | 18 (392)        | 1.20 (0.75, 1.90)        | 9 (229)         | 1.21 (0.63, 2.33)        | 9 (163)         | 1.20 (0.62, 2.30)        |
| [397] Signs and Displays                                     | 27 (758)        | 1.05 (0.72, 1.53)        | -               | -                        | -               | -                        |
| [399] Miscellaneous Manufacturing Industries                 | 49 (1,302)      | 0.98 (0.74, 1.30)        | 30 (816)        | 1.12 (0.79, 1.60)        | 19 (486)        | 0.83 (0.53, 1.30)        |
| <b>[6] Construction Industry</b>                             | 1,362 (50,852)  | <i>0.79 (0.75, 0.84)</i> | 1,269 (48,153)  | <i>0.80 (0.76, 0.85)</i> | 93 (2,699)      | <i>0.73 (0.60, 0.90)</i> |
| <i>[34] General Contractors</i>                              | 470 (17,440)    | <i>0.80 (0.73, 0.88)</i> | 426 (16,219)    | <i>0.81 (0.74, 0.90)</i> | 44 (1,221)      | <i>0.76 (0.57, 1.03)</i> |
| [404] Building Construction                                  | 247 (9,621)     | <i>0.76 (0.67, 0.86)</i> | 209 (8,689)     | <i>0.74 (0.65, 0.85)</i> | 38 (932)        | 0.87 (0.63, 1.19)        |
| [406] Highway, Bridge and Street Construction                | 104 (3,562)     | 0.89 (0.73, 1.08)        | -               | -                        | -               | -                        |
| [409] Other Construction                                     | 119 (4,257)     | 0.86 (0.72, 1.03)        | 114 (4,087)     | 0.88 (0.73, 1.06)        | 5 (170)         | 0.62 (0.26, 1.50)        |
| <i>[35] Special-Trade Contractors</i>                        | 892 (33,412)    | <i>0.80 (0.75, 0.86)</i> | 843 (31,934)    | <i>0.81 (0.76, 0.87)</i> | 49 (1,478)      | <i>0.71 (0.53, 0.94)</i> |
| [421] Special-Trade Contractors                              | 892 (33,412)    | <i>0.80 (0.75, 0.86)</i> | 843 (31,934)    | <i>0.81 (0.76, 0.87)</i> | 49 (1,478)      | <i>0.71 (0.53, 0.94)</i> |
| <b>[7] Transportation, Communication and Other Utilities</b> | 1,681 (48,474)  | 0.97 (0.92, 1.02)        | 1,189 (37,843)  | 0.95 (0.90, 1.01)        | 492 (10,631)    | 0.99 (0.90, 1.08)        |
| <i>[36] Transportation</i>                                   | 1,165 (33,879)  | 0.98 (0.92, 1.04)        | 878 (27,745)    | 0.96 (0.90, 1.03)        | 287 (6,134)     | 1.00 (0.89, 1.12)        |
| [501] Air Transport                                          | 191 (4,483)     | 1.14 (0.99, 1.32)        | 120 (2,886)     | <b>1.29 (1.08, 1.54)</b> | 71 (1,597)      | 0.95 (0.75, 1.20)        |
| [502] Services Incidental to Air Transport                   | 87 (1,906)      | <b>1.31 (1.06, 1.61)</b> | 58 (1,500)      | 1.23 (0.95, 1.59)        | 29 (406)        | <b>1.55 (1.08, 2.23)</b> |
| [503] Railway Transport                                      | 53 (1,434)      | 1.05 (0.80, 1.37)        | 41 (1,184)      | 1.04 (0.77, 1.41)        | 12 (250)        | 1.03 (0.59, 1.82)        |



Table A1. Hazard Ratios for Dermatitis Among Industry Groups

| Industry Group*                                      | Overall         |                          | Male            |                          | Female          |                   |
|------------------------------------------------------|-----------------|--------------------------|-----------------|--------------------------|-----------------|-------------------|
|                                                      | Cases (Workers) | HR† (95% CI)             | Cases (Workers) | HR‡ (95% CI)             | Cases (Workers) | HR‡ (95% CI)      |
| [504] Water Transport                                | 12 (287)        | 1.21 (0.69, 2.14)        | -               | -                        | -               | -                 |
| [505] Services Incidental to Water Transport         | <5 (89)         | -                        | -               | -                        | -               | -                 |
| [506] Moving and Storage, Used Goods, Uncrated       | 19 (648)        | 0.89 (0.57, 1.40)        | -               | -                        | -               | -                 |
| [507] Other Truck Transport                          | 406 (15,340)    | 0.78 (0.70, 0.86)        | 373 (14,160)    | 0.79 (0.71, 0.88)        | 33 (1,180)      | 0.59 (0.42, 0.83) |
| [508] Bus Transport, Interurban and Rural            | 10 (213)        | 1.32 (0.71, 2.45)        | -               | -                        | -               | -                 |
| [509] Urban Transit Systems                          | 158 (3,200)     | <b>1.39 (1.19, 1.63)</b> | 118 (2,501)     | <b>1.45 (1.21, 1.74)</b> | 40 (699)        | 1.23 (0.90, 1.68) |
| [512] Taxicab Operations                             | 10 (245)        | 1.08 (0.58, 2.01)        | -               | -                        | -               | -                 |
| [515] Pipeline Transport                             | <5 (17)         | -                        | -               | -                        | -               | -                 |
| [516] Highway and Bridge Maintenance                 | 11 (315)        | 1.06 (0.59, 1.92)        | -               | -                        | -               | -                 |
| [517] Miscellaneous Services Incidental to Transport | 114 (3,523)     | 0.93 (0.77, 1.12)        | 84 (2,990)      | 0.85 (0.69, 1.06)        | 30 (533)        | 1.20 (0.84, 1.72) |
| [519] Other Transportation                           | 91 (2,180)      | 1.03 (0.84, 1.26)        | 33 (933)        | 1.09 (0.77, 1.53)        | 58 (1,247)      | 1.00 (0.77, 1.29) |
| [37] Storage                                         | 103 (3,423)     | 0.85 (0.70, 1.03)        | 76 (2,734)      | 0.86 (0.69, 1.08)        | 27 (689)        | 0.83 (0.57, 1.21) |
| [524] Grain Elevators                                | <5 (72)         | -                        | -               | -                        | -               | -                 |
| [527] Other Storage and Warehousing                  | 102 (3,351)     | 0.86 (0.71, 1.05)        | 75 (2,674)      | 0.87 (0.69, 1.09)        | 27 (677)        | 0.85 (0.58, 1.24) |
| [38] Communication                                   | 302 (7,700)     | 1.00 (0.89, 1.12)        | 150 (4,350)     | 1.04 (0.88, 1.22)        | 152 (3,350)     | 0.97 (0.82, 1.13) |
| [543] Radio and Television Broadcasting              | 41 (795)        | <b>1.39 (1.03, 1.89)</b> | 28 (532)        | <b>1.63 (1.12, 2.36)</b> | 13 (263)        | 1.05 (0.61, 1.80) |
| [544] Telephone Systems                              | 10 (220)        | 1.26 (0.68, 2.34)        | -               | -                        | -               | -                 |
| [545] Telegraph and Cable Systems                    | <5 (33)         | -                        | -               | -                        | -               | -                 |
| [548] Post Office                                    | 250 (6,652)     | 0.95 (0.84, 1.08)        | 118 (3,636)     | 0.97 (0.81, 1.16)        | 132 (3,016)     | 0.93 (0.79, 1.11) |
| [39] Electric Power, Gas and Water Utilities         | 111 (3,472)     | 0.92 (0.77, 1.11)        | 85 (3,014)      | 0.86 (0.69, 1.06)        | 26 (458)        | 1.20 (0.82, 1.77) |
| [572] Electric Power                                 | 65 (1,458)      | <b>1.27 (1.00, 1.62)</b> | 49 (1,211)      | 1.23 (0.93, 1.62)        | 16 (247)        | 1.38 (0.85, 2.25) |
| [574] Gas Distribution                               | <5 (180)        | -                        | -               | -                        | -               | -                 |
| [576] Water Systems                                  | <5 (76)         | -                        | -               | -                        | -               | -                 |
| [579] Other Utilities                                | 41 (1,758)      | 0.69 (0.51, 0.94)        | 33 (1,597)      | 0.64 (0.45, 0.90)        | 8 (161)         | 1.05 (0.52, 2.09) |
| <b>[8] Trade</b>                                     | 3,999 (110,951) | 0.95 (0.92, 0.99)        | 2,169 (70,671)  | 0.95 (0.91, 1.00)        | 1,830 (40,280)  | 0.96 (0.91, 1.01) |
| [40] Wholesale Trade                                 | 1,253 (37,006)  | 0.96 (0.90, 1.01)        | 893 (29,656)    | 0.93 (0.87, 0.99)        | 360 (7,350)     | 1.05 (0.94, 1.16) |
| [602] Farm Products                                  | 7 (233)         | 0.84 (0.40, 1.76)        | -               | -                        | -               | -                 |

Table A1. Hazard Ratios for Dermatitis Among Industry Groups

| Industry Group*                                    | Overall         |                          | Male            |                          | Female          |                          |
|----------------------------------------------------|-----------------|--------------------------|-----------------|--------------------------|-----------------|--------------------------|
|                                                    | Cases (Workers) | HR† (95% CI)             | Cases (Workers) | HR‡ (95% CI)             | Cases (Workers) | HR‡ (95% CI)             |
| [608] Petroleum Products                           | 17 (902)        | 0.56 (0.35, 0.90)        | -               | -                        | -               | -                        |
| [611] Paper and Paper Products                     | 15 (438)        | 0.94 (0.56, 1.55)        | 16 (852)        | 0.57 (0.35, 0.93)        | 5 (114)         | 0.92 (0.39, 2.22)        |
| [612] General Merchandise                          | 12 (228)        | 1.26 (0.72, 2.22)        | 10 (324)        | 0.94 (0.51, 1.75)        | 10 (155)        | 1.40 (0.75, 2.59)        |
| [614] Food                                         | 153 (4,972)     | 0.89 (0.76, 1.04)        | -               | -                        | -               | -                        |
| [615] Tobacco Products                             | <5 (214)        | -                        | -               | -                        | -               | -                        |
| [616] Drug and Toilet Preparations                 | 19 (502)        | 0.93 (0.59, 1.46)        | -               | -                        | -               | -                        |
| [617] Apparel and Dry Goods                        | 26 (521)        | 1.26 (0.86, 1.85)        | 5 (225)         | 0.68 (0.28, 1.62)        | 16 (255)        | 1.35 (0.83, 2.20)        |
| [618] Household Furniture and Furnishings          | 9 (304)         | 0.84 (0.44, 1.61)        | -               | -                        | -               | -                        |
| [619] Motor Vehicles and Accessories               | 98 (2,956)      | 0.95 (0.78, 1.16)        | 75 (2,478)      | 0.80 (0.36, 1.78)        | 23 (478)        | 1.02 (0.68, 1.53)        |
| [621] Electrical Machinery, Equipment and Supplies | 74 (1,637)      | <b>1.25 (1.00, 1.57)</b> | 45 (1,208)      | 0.94 (0.75, 1.17)        | 29 (429)        | <b>1.47 (1.02, 2.11)</b> |
| [622] Farm Machinery and Equipment                 | <5 (596)        | -                        | -               | -                        | -               | -                        |
| [623] Machinery and Equipment, n.e.s.              | 161 (4,663)     | 0.99 (0.85, 1.16)        | 124 (3,923)     | 0.97 (0.81, 1.15)        | 37 (740)        | 1.07 (0.77, 1.48)        |
| [624] Hardware, Plumbing and Heating Equipment     | 59 (1,727)      | 0.98 (0.76, 1.27)        | 43 (1,451)      | 0.97 (0.81, 1.15)        | 16 (276)        | 1.25 (0.77, 2.04)        |
| [625] Metal and Metal Products, n.e.s.             | 29 (811)        | 1.07 (0.74, 1.54)        | 24 (766)        | 0.91 (0.68, 1.23)        | 5 (45)          | <b>2.46 (1.03, 5.90)</b> |
| [626] Lumber and Building Materials                | 267 (7,958)     | 0.96 (0.85, 1.08)        | 200 (6,348)     | 0.96 (0.64, 1.43)        | 67 (1,610)      | 0.89 (0.70, 1.13)        |
| [627] Scrap and Waste Materials, n.e.s.            | 70 (2,263)      | 0.94 (0.74, 1.19)        | 64 (2,155)      | 0.99 (0.86, 1.14)        | 6 (108)         | 1.18 (0.53, 2.64)        |
| [629] Wholesalers n.e.s.                           | 221 (6,073)     | 0.99 (0.86, 1.13)        | 124 (4,246)     | 0.93 (0.73, 1.19)        | 97 (1827)       | 1.13 (0.93, 1.38)        |
| [41] Retail Trade                                  | 2,747 (73,952)  | 0.96 (0.92, 1.00)        | 1276 (41,018)   | 0.90 (0.75, 1.07)        | 1470 (32,934)   | 0.94 (0.89, 1.00)        |
| [631] Food Stores                                  | 828 (21,310)    | 0.99 (0.92, 1.06)        | 353 (10,600)    | 1.07 (0.97, 1.19)        | 475 (10,710)    | 0.94 (0.86, 1.03)        |
| [642] General Merchandise Stores                   | 376 (9,104)     | 1.00 (0.90, 1.11)        | 109 (3,537)     | 0.97 (0.80, 1.17)        | 267 (5,567)     | 1.03 (0.91, 1.16)        |
| [652] Tire, Battery and Accessories Stores         | 76 (2,425)      | 0.87 (0.69, 1.08)        | 52 (1,751)      | 0.94 (0.72, 1.24)        | 24 (674)        | 0.76 (0.51, 1.13)        |
| [654] Gasoline Service Stations                    | 79 (2,177)      | 1.00 (0.80, 1.25)        | 47 (1,543)      | 0.96 (0.72, 1.28)        | 32 (634)        | 1.08 (0.77, 1.53)        |
| [656] Motor Vehicle Dealers                        | 217 (6,478)     | 0.97 (0.85, 1.11)        | 170 (5,541)     | 0.95 (0.82, 1.10)        | 47 (937)        | 1.07 (0.80, 1.43)        |
| [663] Shoe Stores                                  | 13 (435)        | 0.81 (0.71, 0.93)        | -               | -                        | -               | -                        |
| [665] Men's Clothing Stores                        | 11 (182)        | 0.71 (0.41, 1.22)        | -               | -                        | -               | -                        |
| [667] Women's Clothing Stores                      | 86 (1,381)      | 1.60 (0.89, 2.88)        | 11 (110)        | <b>2.65 (1.33, 5.27)</b> | 75 (1,271)      | <b>1.27 (1.01, 1.59)</b> |
| [669] Clothing and Dry Good Stores, n.e.s.         | 125 (2,618)     | <b>1.40 (1.13, 1.73)</b> | 23 (596)        | <b>3.31 (1.83, 5.97)</b> | 102 (2,022)     | 1.08 (0.89, 1.31)        |

Table A1. Hazard Ratios for Dermatitis Among Industry Groups

| Industry Group*                                                 | Overall         |                          | Male            |                          | Female          |                          |
|-----------------------------------------------------------------|-----------------|--------------------------|-----------------|--------------------------|-----------------|--------------------------|
|                                                                 | Cases (Workers) | HR <sup>†</sup> (95% CI) | Cases (Workers) | HR <sup>‡</sup> (95% CI) | Cases (Workers) | HR <sup>‡</sup> (95% CI) |
| [673] Hardware Stores                                           | 18 (570)        | 1.12 (0.94, 1.33)        | 9 (408)         | 1.23 (0.82, 1.85)        | 9 (162)         | 1.19 (0.62, 2.29)        |
| [676] Household Furniture and Appliance Stores                  | 117 (3,231)     | 0.86 (0.54, 1.37)        | 77 (2,399)      | 0.68 (0.35, 1.30)        | 40 (832)        | 1.03 (0.75, 1.40)        |
| [678] Radio, Television and Electrical Appliance Repair Shops   | 5 (159)         | 1.01 (0.84, 1.21)        | -               | -                        | -               | -                        |
| [681] Drug Stores                                               | 82 (2,274)      | 0.88 (0.37, 2.12)        | 18 (603)        | 0.52 (0.13, 2.06)        | 64 (1,671)      | 0.82 (0.64, 1.05)        |
| [691] Book and Stationery Stores                                | 42 (1,135)      | 0.85 (0.68, 1.05)        | 12 (466)        | 0.95 (0.60, 1.50)        | 30 (669)        | 0.97 (0.68, 1.38)        |
| [692] Florists, Shops                                           | 9 (442)         | 0.92 (0.68, 1.24)        | -               | -                        | -               | -                        |
| [694] Jewelry Stores                                            | 9 (86)          | 0.51 (0.27, 0.98)        | -               | -                        | -               | -                        |
| [695] Watch and Jewelry Repair Shops                            | 6 (102)         | -                        | 0 (12)          | -                        | 6 (90)          | 1.43 (0.64, 3.18)        |
| [696] Liquor, Wine and Beer Stores                              | 103 (2,376)     | 1.32 (0.59, 2.93)        | 46 (1,184)      | 1.20 (0.90, 1.61)        | 57 (1,192)      | 1.01 (0.78, 1.31)        |
| <b>[9] Finance, Insurance and Real Estate</b>                   | 194 (5,460)     | 0.92 (0.80, 1.06)        | 95 (3,147)      | 0.92 (0.75, 1.12)        | 99 (2,313)      | 0.91 (0.75, 1.11)        |
| <i>[42] Finance Industries</i>                                  | 18 (640)        | 0.74 (0.47, 1.17)        | 11 (408)        | 0.83 (0.46, 1.49)        | 7 (232)         | 0.64 (0.30, 1.33)        |
| [701] Banks and other Deposit Accepting Establishments          | <5 (75)         | -                        | -               | -                        | -               | -                        |
| [703] Other Credit Agencies                                     | 5 (226)         | 0.56 (0.23, 1.34)        | -               | -                        | -               | -                        |
| [707] Investment and Holding Companies                          | 10 (334)        | 0.81 (0.44, 1.51)        | -               | -                        | -               | -                        |
| <i>[43] Insurance and Real Estate Industries</i>                | 176 (4,820)     | 0.94 (0.81, 1.09)        | 84 (2,739)      | 0.93 (0.75, 1.15)        | 92 (2,081)      | 0.95 (0.77, 1.16)        |
| [721] Insurance Carriers                                        | <5 (74)         | -                        | -               | -                        | -               | -                        |
| [735] Insurance and Real Estate Agencies                        | 5 (154)         | 0.85 (0.35, 2.04)        | -               | -                        | -               | -                        |
| [737] Real Estate Operators                                     | 167 (4,592)     | 0.94 (0.81, 1.09)        | 82 (2,621)      | 0.95 (0.76, 1.18)        | 85 (1,971)      | 0.93 (0.75, 1.15)        |
| <b>[10] Community, Business and Personal Service Industries</b> | 7,558 (181,429) | 1.02 (0.99, 1.05)        | 2,323 (68,449)  | <b>1.08 (1.03, 1.13)</b> | 5,235 (112,980) | 0.98 (0.94, 1.02)        |
| <i>[45] Education and Related Services</i>                      | 1,522 (33,555)  | <b>1.08 (1.02, 1.13)</b> | 387 (10,611)    | <b>1.11 (1.00, 1.23)</b> | 1,135 (22,944)  | <b>1.07 (1.01, 1.14)</b> |
| [801] Kindergartens and Nursery Schools                         | <5 (83)         | -                        | -               | -                        | -               | -                        |
| [802] Elementary and Secondary Schools                          | 469 (9,855)     | <b>1.10 (1.00, 1.20)</b> | 100 (2,429)     | <b>1.24 (1.02, 1.51)</b> | 369 (7,426)     | 1.07 (0.96, 1.18)        |
| [804] Vocational Centers, Trade Schools and Business Colleges   | 34 (991)        | 0.99 (0.71, 1.39)        | 22 (686)        | 1.12 (0.74, 1.71)        | 12 (305)        | 0.84 (0.47, 1.47)        |
| [805] Post-Secondary Non-University Educational Institutions    | 18 (526)        | 0.83 (0.52, 1.32)        | 7 (205)         | 1.04 (0.50, 2.18)        | 11 (321)        | 0.74 (0.41, 1.33)        |

Table A1. Hazard Ratios for Dermatitis Among Industry Groups

| Industry Group*                                          | Overall         |                          | Male            |                          | Female          |                          |
|----------------------------------------------------------|-----------------|--------------------------|-----------------|--------------------------|-----------------|--------------------------|
|                                                          | Cases (Workers) | HR† (95% CI)             | Cases (Workers) | HR‡ (95% CI)             | Cases (Workers) | HR‡ (95% CI)             |
| [806] Universities and Colleges                          | 169 (4,148)     | 1.01 (0.87, 1.18)        | 60 (1,837)      | 1.02 (0.79, 1.31)        | 109 (2,311)     | 1.01 (0.84, 1.22)        |
| [807] Libraries, Museums and Other Repositories          | 30 (567)        | 1.23 (0.86, 1.76)        | 7 (142)         | 1.56 (0.74, 3.26)        | 23 (425)        | 1.17 (0.77, 1.75)        |
| [809] Education and Related Services, n.e.s.             | 799 (17,381)    | <b>1.08 (1.00, 1.16)</b> | 191 (5,307)     | 1.07 (0.93, 1.24)        | 608 (12,074)    | <b>1.09 (1.00, 1.18)</b> |
| <i>[46] Health and Welfare Services</i>                  | 2,315 (52,374)  | 0.98 (0.93, 1.02)        | 272 (6,858)     | <b>1.21 (1.08, 1.37)</b> | 2,043 (45,516)  | 0.95 (0.90, 1.00)        |
| [821] Hospitals                                          | 810 (19,055)    | 0.94 (0.88, 1.01)        | 113 (2,882)     | 1.19 (0.99, 1.44)        | 697 (16,173)    | 0.91 (0.84, 0.98)        |
| [822] Related Health Care Institutions                   | 578 (12,577)    | 1.01 (0.93, 1.10)        | 44 (1,152)      | 1.17 (0.87, 1.57)        | 534 (11,425)    | 1.00 (0.92, 1.09)        |
| [823] Offices of Physicians and Surgeons                 | 34 (536)        | <b>1.40 (1.00, 1.96)</b> | -               | -                        | -               | -                        |
| [824] Office of Para-medical Personnel (Practitioners)   | 49 (1,090)      | 0.97 (0.73, 1.28)        | -               | -                        | -               | -                        |
| [825] Offices of Dentists                                | <5 (46)         | -                        | -               | -                        | -               | -                        |
| [826] Diagnostic and Therapeutic Services, n.e.s.        | 67 (1,339)      | 1.12 (0.88, 1.42)        | 11 (212)        | 1.57 (0.87, 2.83)        | 56 (1,127)      | 1.07 (0.82, 1.39)        |
| [827] Miscellaneous Health Services                      | 235 (5,829)     | 0.90 (0.79, 1.02)        | 30 (821)        | 1.12 (0.79, 1.60)        | 205 (5,008)     | 0.88 (0.76, 1.01)        |
| [828] Welfare Organizations                              | 538 (11,902)    | 1.01 (0.93, 1.10)        | 70 (1,662)      | <b>1.30 (1.03, 1.64)</b> | 468 (10,240)    | 0.98 (0.89, 1.07)        |
| <i>[47] Religious Organizations</i>                      | 11 (346)        | 0.77 (0.43, 1.39)        | -               | -                        | -               | -                        |
| [831] Religious Organizations                            | 11 (346)        | 0.77 (0.43, 1.39)        | -               | -                        | -               | -                        |
| <i>[48] Amusement and Recreation Services</i>            | 274 (7,389)     | 0.96 (0.85, 1.08)        | 123 (4,022)     | 0.96 (0.80, 1.14)        | 151 (3,367)     | 0.95 (0.81, 1.12)        |
| [841] Motion Picture Theatres                            | 14 (229)        | 1.60 (0.95, 2.69)        | -               | -                        | -               | -                        |
| [842] Motion Picture Production and Distribution         | 24 (627)        | 1.07 (0.72, 1.60)        | 12 (473)        | 0.78 (0.44, 1.37)        | 12 (154)        | 1.69 (0.96, 2.98)        |
| [843] Bowling Alleys and Billiard Parlors                | <5 (30)         | -                        | -               | -                        | -               | -                        |
| [844] Golf Clubs and Country Clubs                       | 29 (816)        | 0.97 (0.67, 1.40)        | 17 (540)        | 1.01 (0.63, 1.63)        | 12 (276)        | 0.92 (0.52, 1.62)        |
| [845] Theatrical and Other Staged Entertainment Services | <5 (194)        | -                        | -               | -                        | -               | -                        |
| [849] Miscellaneous Amusement and Recreation Services    | 202 (5,493)     | 0.93 (0.81, 1.07)        | 86 (2,755)      | 0.97 (0.79, 1.20)        | 116 (2,738)     | 0.90 (0.75, 1.08)        |
| <i>[49] Services to Business Management</i>              | 1,126 (29,649)  | 1.04 (0.98, 1.10)        | 679 (20,302)    | 1.06 (0.98, 1.14)        | 447 (9,347)     | 1.02 (0.93, 1.12)        |
| [851] Employment Agencies and Personnel Suppliers        | 561 (15,406)    | 1.02 (0.94, 1.11)        | 371 (11,514)    | 1.02 (0.92, 1.13)        | 190 (3,892)     | 1.05 (0.91, 1.21)        |
| [853] Computer Services                                  | 15 (433)        | 0.90 (0.55, 1.50)        | 9 (270)         | 1.02 (0.53, 1.95)        | 6 (163)         | 0.78 (0.35, 1.73)        |

Table A1. Hazard Ratios for Dermatitis Among Industry Groups

| Industry Group*                                              | Overall         |                          | Male            |                          | Female          |                          |
|--------------------------------------------------------------|-----------------|--------------------------|-----------------|--------------------------|-----------------|--------------------------|
|                                                              | Cases (Workers) | HR <sup>†</sup> (95% CI) | Cases (Workers) | HR <sup>‡</sup> (95% CI) | Cases (Workers) | HR <sup>‡</sup> (95% CI) |
| [855] Security and Investigation Services                    | 143 (3,480)     | 1.16 (0.99, 1.37)        | 100 (2,662)     | 1.18 (0.97, 1.44)        | 43 (818)        | 1.13 (0.83, 1.52)        |
| [861] Offices of Accountants                                 | 8 (292)         | 0.63 (0.31, 1.25)        | -               | -                        | -               | -                        |
| [862] Advertising Services                                   | 39 (693)        | <b>1.45 (1.06, 1.99)</b> | 19 (372)        | <b>1.59 (1.02, 2.49)</b> | 20 (321)        | 1.34 (0.87, 2.08)        |
| [863] Offices of Architects                                  | <5 (13)         | -                        | -               | -                        | -               | -                        |
| [864] Engineering and Scientific Services                    | 62 (2,049)      | 0.82 (0.64, 1.05)        | 42 (1,401)      | 0.92 (0.68, 1.25)        | 20 (648)        | 0.66 (0.42, 1.01)        |
| [866] Offices of Lawyers and Notaries                        | <5 (56)         | -                        | -               | -                        | -               | -                        |
| [867] Offices of Management and Business Consultants         | 15 (375)        | 1.04 (0.63, 1.72)        | 7 (214)         | 1.00 (0.48, 2.10)        | 8 (161)         | 1.07 (0.54, 2.14)        |
| [869] Miscellaneous Services to Business Management          | 281 (6,853)     | 1.06 (0.94, 1.19)        | 129 (3,779)     | 1.07 (0.90, 1.27)        | 152 (3,074)     | 1.06 (0.90, 1.24)        |
| [50] Personal Services                                       | 92 (2,838)      | 0.78 (0.64, 0.96)        | 22 (1,068)      | 0.64 (0.42, 0.97)        | 70 (1,770)      | 0.84 (0.67, 1.07)        |
| [872] Barber and Beauty Shops                                | 7 (72)          | <b>2.18 (1.04, 4.55)</b> | -               | -                        | -               | -                        |
| [873] Private Households                                     | 46 (1,204)      | 0.86 (0.65, 1.15)        | -               | -                        | -               | -                        |
| [874] Laundries, Cleaners and Pressers (except Self-service) | 32 (1,281)      | 0.63 (0.45, 0.89)        | 11 (677)        | 0.50 (0.28, 0.90)        | 21 (604)        | 0.74 (0.48, 1.13)        |
| [876] Self-service Laundries and Dry Cleaners                | <5 (32)         | -                        | -               | -                        | -               | -                        |
| [877] Funeral Services                                       | <5 (163)        | -                        | -               | -                        | -               | -                        |
| [879] Miscellaneous Personal Services                        | <5 (83)         | -                        | -               | -                        | -               | -                        |
| [51] Accommodation and Food Services                         | 1,664 (39,457)  | <b>1.06 (1.01, 1.12)</b> | 563 (16,324)    | <b>1.13 (1.04, 1.23)</b> | 1,101 (23,133)  | 1.02 (0.95, 1.08)        |
| [881] Hotels and Motels                                      | 227 (5,649)     | 0.97 (0.85, 1.10)        | 67 (1,981)      | 1.06 (0.84, 1.35)        | 160 (3,668)     | 0.93 (0.80, 1.09)        |
| [883] Lodging Houses and Residential Clubs                   | <5 (170)        | -                        | -               | -                        | -               | -                        |
| [884] Camping Grounds and Trailer Parks                      | 9 (315)         | 0.77 (0.40, 1.47)        | -               | -                        | -               | -                        |
| [886] Restaurants, Caterers and Taverns                      | 1,424 (33,323)  | <b>1.09 (1.03, 1.15)</b> | 492 (14,098)    | <b>1.16 (1.05, 1.27)</b> | 932 (19,225)    | 1.04 (0.97, 1.11)        |
| [52] Miscellaneous Services                                  | 554 (15,824)    | 0.91 (0.83, 0.99)        | 270 (9,127)     | 0.92 (0.81, 1.03)        | 284 (6,697)     | 0.90 (0.80, 1.02)        |
| [891] Labour Organizations and Trade Associations            | 46 (1,861)      | 0.55 (0.41, 0.74)        | 7 (316)         | 0.67 (0.32, 1.40)        | 39 (1,545)      | 0.53 (0.39, 0.73)        |
| [893] Photographic Services, n.e.s.                          | 5 (97)          | 1.20 (0.50, 2.88)        | 0 (29)          | -                        | 5 (68)          | 1.57 (0.66, 3.76)        |
| [894] Automobile and Truck Rental                            | 33 (1,011)      | 0.93 (0.66, 1.31)        | 23 (829)        | 0.85 (0.56, 1.27)        | 10 (182)        | 1.17 (0.63, 2.18)        |
| [895] Machinery and Equipment Rental                         | 32 (1,231)      | 0.78 (0.55, 1.10)        | 25 (1,118)      | 0.70 (0.47, 1.04)        | 7 (113)         | 1.33 (0.63, 2.79)        |
| [896] Blacksmithing and Welding Shops                        | 22 (577)        | 1.18 (0.77, 1.79)        | -               | -                        | -               | -                        |

Table A1. Hazard Ratios for Dermatitis Among Industry Groups

| Industry Group*                               | Overall         |                   | Male            |                   | Female          |                          |
|-----------------------------------------------|-----------------|-------------------|-----------------|-------------------|-----------------|--------------------------|
|                                               | Cases (Workers) | HR† (95% CI)      | Cases (Workers) | HR‡ (95% CI)      | Cases (Workers) | HR‡ (95% CI)             |
| [897] Miscellaneous Repair Shops              | 19 (716)        | 0.79 (0.51, 1.24) | -               | -                 | -               | -                        |
| [898] Services to Buildings and Dwellings     | 192 (5,738)     | 0.87 (0.75, 1.00) | 104 (3,336)     | 0.97 (0.80, 1.18) | 88 (2,402)      | <i>0.78 (0.63, 0.96)</i> |
| [899] Miscellaneous Services, n.e.s.          | 205 (4,593)     | 1.13 (0.99, 1.30) | 73 (2,265)      | 1.00 (0.79, 1.26) | 132 (2,328)     | <b>1.22 (1.03, 1.45)</b> |
| <b>[11] Public Administration and Defense</b> | 1,886 (48,361)  | 1.00 (0.95, 1.05) | 874 (26,730)    | 1.00 (0.94, 1.07) | 1,012 (21,631)  | 1.00 (0.94, 1.06)        |
| <i>[53] Federal Administration</i>            | 275 (6,403)     | 1.04 (0.92, 1.17) | 92 (2,557)      | 1.08 (0.88, 1.33) | 183 (3,846)     | 1.02 (0.88, 1.18)        |
| [902] Defense Services                        | 35 (921)        | 0.95 (0.68, 1.33) | 16 (468)        | 1.01 (0.62, 1.65) | 19 (453)        | 0.91 (0.58, 1.42)        |
| [909] Other Federal Administration            | 240 (5,482)     | 1.05 (0.93, 1.19) | 76 (2,089)      | 1.10 (0.88, 1.38) | 164 (3,393)     | 1.04 (0.89, 1.21)        |
| <i>[54] Provincial Administration</i>         | 336 (9,372)     | 0.91 (0.82, 1.01) | 157 (5,015)     | 0.96 (0.82, 1.12) | 179 (4,357)     | 0.87 (0.75, 1.01)        |
| [931] Provincial Administration               | 336 (9,372)     | 0.91 (0.82, 1.01) | 157 (5,015)     | 0.96 (0.82, 1.12) | 179 (4,357)     | 0.87 (0.75, 1.01)        |
| <i>[55] Local Administration</i>              | 1,275 (32,582)  | 1.02 (0.96, 1.08) | 625 (19,156)    | 1.00 (0.93, 1.09) | 650 (13,426)    | 1.03 (0.96, 1.12)        |
| [951] Local Administration                    | 1,275 (32,582)  | 1.02 (0.96, 1.08) | 625 (19,156)    | 1.00 (0.93, 1.09) | 650 (13,426)    | 1.03 (0.96, 1.12)        |

## \*[SIC-80] Industry Division Group

*[SIC-80] Industry Major Group*

[SIC-80] Industry Minor Group

Definition of abbreviations: HR=hazard ratio, CI=confidence interval, NEC=not elsewhere classified

Dashes indicate suppression of results for groups with &lt;5 cases

Statistically significant ( $\alpha=0.05$  level) increased risks are bolded and statistically significant decreased risks are italicized

† The risk of dermatitis in a particular group relative to all other workers in the cohort, adjusted for birth year and sex

‡ The sex-specific risk of dermatitis among a particular group relative to all other workers of that sex, adjusted for birth year

Table A2. Hazard Ratios for Dermatitis Among Occupation Groups

| Occupation Group*                                                      | Overall         |                          | Male            |                          | Female          |                          |
|------------------------------------------------------------------------|-----------------|--------------------------|-----------------|--------------------------|-----------------|--------------------------|
|                                                                        | Cases (Workers) | HR <sup>†</sup> (95% CI) | Cases (Workers) | HR <sup>‡</sup> (95% CI) | Cases (Workers) | HR <sup>‡</sup> (95% CI) |
| <b>[11] Managerial, administrative and related occupations</b>         | 514 (12,720)    | 0.98 (0.90, 1.07)        | 145 (5237)      | 1.01 (0.87, 1.17)        | 309 (7483)      | 0.97 (0.87, 1.08)        |
| <i>[111] Officials and administrators unique to government</i>         | 86 (1,883)      | 1.08 (0.87, 1.34)        | 26 (651)        | 0.96 (0.63, 1.47)        | 71 (1,232)      | 1.13 (0.89, 1.45)        |
| [1111] Members of legislative bodies                                   | <5 (14)         | -                        | -               | -                        | -               | -                        |
| [1113] Government administrators                                       | 7 (220)         | 0.75 (0.36, 1.57)        | 0 (80)          | -                        | 7 (140)         | 1.08 (0.52, 2.27)        |
| [1115] Postmasters                                                     | <5 (55)         | -                        | -               | -                        | -               | -                        |
| [1119] Officials and administrators unique to government, n.e.c.       | 75 (1,594)      | 1.11 (0.89, 1.40)        | 20 (547)        | 1.10 (0.71, 1.71)        | 55 (1,047)      | 1.13 (0.87, 1.47)        |
| <i>[113/114] Other managers and administrators</i>                     | 181 (5,333)     | 0.86 (0.74, 0.99)        | 46 (2,852)      | 0.86 (0.69, 1.06)        | 64 (2,481)      | 0.85 (0.70, 1.04)        |
| [1130] General managers and other senior officials                     | 11 (201)        | 1.34 (0.74, 2.42)        | 5 (85)          | 1.76 (0.73, 4.22)        | 6 (116)         | 1.14 (0.51, 2.52)        |
| [1131] Management occupations, natural sciences and engineering        | 6 (228)         | 0.70 (0.31, 1.55)        | -               | -                        | -               | -                        |
| [1132] Management occupations, social sciences and related fields      | <5 (193)        | -                        | -               | -                        | -               | -                        |
| [1133] Administrators in teaching and related fields                   | 14 (549)        | 0.58 (0.34, 0.98)        | -               | -                        | -               | -                        |
| [1134] Administrators in medicine and health                           | 8 (193)         | 0.91 (0.46, 1.83)        | -               | -                        | -               | -                        |
| [1135] Financial management occupations                                | 12 (306)        | 0.91 (0.52, 1.61)        | -               | -                        | -               | -                        |
| [1136] Personnel and industrial relations management occupations       | 7 (137)         | 1.11 (0.53, 2.33)        | 0 (22)          | -                        | 7 (115)         | 1.28 (0.61, 2.68)        |
| [1137] Sales and advertising management occupations                    | 20 (402)        | 1.25 (0.80, 1.93)        | 7 (195)         | 1.08 (0.51, 2.26)        | 13 (207)        | 1.36 (0.79, 2.34)        |
| [1141] Purchasing management occupations                               | <5 (61)         | -                        | -               | -                        | -               | -                        |
| [1142] Services management occupations                                 | 7 (296)         | 0.60 (0.29, 1.25)        | -               | -                        | -               | -                        |
| [1143] Production management occupations                               | 13 (455)        | 0.81 (0.47, 1.40)        | -               | -                        | -               | -                        |
| [1145] Management occupations, construction operations                 | 12 (296)        | 1.21 (0.69, 2.13)        | -               | -                        | -               | -                        |
| [1147] Management occupations, transport and communications operations | 6 (229)         | 0.69 (0.31, 1.53)        | -               | -                        | -               | -                        |
| [1149] Other Managers and Administrators, n.e.c.                       | 60 (1,788)      | 1.34 (0.74, 2.42)        | 31 (1064)       | 0.88 (0.62, 1.25)        | 29 (724)        | 0.86 (0.60, 1.24)        |

Table A2. Hazard Ratios for Dermatitis Among Occupation Groups

| Occupation Group*                                                        | Overall         |                          | Male            |                          | Female          |                          |
|--------------------------------------------------------------------------|-----------------|--------------------------|-----------------|--------------------------|-----------------|--------------------------|
|                                                                          | Cases (Workers) | HR <sup>†</sup> (95% CI) | Cases (Workers) | HR <sup>‡</sup> (95% CI) | Cases (Workers) | HR <sup>‡</sup> (95% CI) |
| <i>[117] Occupation Related to Management and Administration</i>         | 247 (5,504)     | 1.06 (0.93, 1.20)        | 73 (1,734)      | <b>1.27 (1.01, 1.60)</b> | 174 (3,770)     | 0.99 (0.85, 1.15)        |
| [1171] Accountants, auditors and other financial officers                | 40 (799)        | 1.16 (0.85, 1.58)        | 12 (209)        | 1.73 (0.98, 3.05)        | 28 (590)        | 1.02 (0.70, 1.47)        |
| [1174] Personnel and related officers                                    | 17 (461)        | 0.84 (0.52, 1.35)        | -               | -                        | -               | -                        |
| [1175] Purchasing officers and buyers, except wholesale and retail trade | 10 (171)        | 1.43 (0.77, 2.66)        | 5 (69)          | 2.19 (0.91, 5.24)        | 5 (102)         | 1.06 (0.44, 2.55)        |
| [1176] Inspectors and regulatory officers, non-government                | 53 (1,329)      | 1.05 (0.81, 1.38)        | 33 (842)        | 1.18 (0.84, 1.67)        | 20 (487)        | 0.88 (0.57, 1.37)        |
| [1179] Occupations related to management and administration, n.e.c.      | 127 (2,744)     | 1.04 (0.87, 1.24)        | 20 (512)        | 1.18 (0.76, 1.83)        | 107 (2,232)     | 1.03 (0.85, 1.25)        |
| <b>[21] Occupations in natural sciences, engineering and mathematics</b> | 291 (7,608)     | 1.05 (0.94, 1.18)        | 186 (5,591)     | 1.02 (0.88, 1.17)        | 105 (2,017)     | 1.11 (0.92, 1.35)        |
| <i>[211] Occupations in physical sciences</i>                            | 23 (511)        | 1.22 (0.81, 1.84)        | 16 (358)        | 1.36 (0.83, 2.22)        | 7 (153)         | 0.98 (0.47, 2.06)        |
| [2111] Chemists                                                          | 9 (125)         | 1.81 (0.94, 3.47)        | -               | -                        | -               | -                        |
| [2112] Geologists                                                        | <5 (23)         | -                        | -               | -                        | -               | -                        |
| [2113] Physicists                                                        | <5 (22)         | -                        | -               | -                        | -               | -                        |
| [2114] Meteorologists                                                    | <5 (5)          | -                        | -               | -                        | -               | -                        |
| [2117] Physical sciences technologists and technicians                   | 9 (313)         | 0.80 (0.42, 1.54)        | -               | -                        | -               | -                        |
| [2119] Occupations in physical sciences, n.e.c.                          | <5 (23)         | -                        | -               | -                        | -               | -                        |
| <i>[213] Occupations in life sciences</i>                                | 33 (725)        | 1.22 (0.87, 1.72)        | 14 (469)        | 0.93 (0.55, 1.56)        | 19 (256)        | <b>1.60 (1.02, 2.50)</b> |
| [2131] Agriculturists and related scientists                             | <5 (72)         | -                        | -               | -                        | -               | -                        |
| [2133] Biologists and related scientists                                 | <5 (83)         | -                        | -               | -                        | -               | -                        |
| [2135] Life sciences technologists and technicians                       | 17 (407)        | 1.13 (0.70, 1.82)        | 6 (271)         | 0.69 (0.31, 1.52)        | 11 (136)        | 1.74 (0.96, 3.14)        |
| [2139] Occupations in life sciences, n.e.c.                              | 9 (163)         | 1.47 (0.76, 2.81)        | -               | -                        | -               | -                        |
| <i>[214/215] Architects and engineers</i>                                | 39 (1,010)      | 1.09 (0.79, 1.49)        | 29 (811)        | 1.07 (0.75, 1.55)        | 10 (199)        | 1.08 (0.58, 2.01)        |
| [2141] Architects                                                        | <5 (31)         | -                        | -               | -                        | -               | -                        |
| [2142] Chemical engineers                                                | <5 (48)         | -                        | -               | -                        | -               | -                        |
| [2143] Civil engineers                                                   | 10 (181)        | 1.58 (0.85, 2.93)        | -               | -                        | -               | -                        |
| [2144] Electrical engineers                                              | 14 (283)        | 1.38 (0.82, 2.33)        | -               | -                        | -               | -                        |



Table A2. Hazard Ratios for Dermatitis Among Occupation Groups

| Occupation Group*                                                                            | Overall         |                          | Male            |                          | Female          |                          |
|----------------------------------------------------------------------------------------------|-----------------|--------------------------|-----------------|--------------------------|-----------------|--------------------------|
|                                                                                              | Cases (Workers) | HR <sup>†</sup> (95% CI) | Cases (Workers) | HR <sup>‡</sup> (95% CI) | Cases (Workers) | HR <sup>‡</sup> (95% CI) |
| [2145] Industrial engineers                                                                  | <5 (95)         | -                        | -               | -                        | -               | -                        |
| [2147] Mechanical engineers                                                                  | <5 (157)        | -                        | -               | -                        | -               | -                        |
| [2151] Metallurgical engineers                                                               | <5 (16)         | -                        | -               | -                        | -               | -                        |
| [2153] Mining engineers                                                                      | <5 (5)          | -                        | -               | -                        | -               | -                        |
| [2154] Petroleum engineers                                                                   | <5 (9)          | -                        | -               | -                        | -               | -                        |
| [2155] Aeronautical engineers                                                                | <5 (24)         | -                        | -               | -                        | -               | -                        |
| [2159] Architects and engineers, n.e.c.                                                      | 5 (161)         | 0.83 (0.35, 1.99)        | -               | -                        | -               | -                        |
| <i>[216] Other occupations in architecture and engineering</i>                               | 146 (4,219)     | 0.97 (0.83, 1.14)        | 99 (3321)       | 0.92 (0.75, 1.12)        | 47 (898)        | 1.12 (0.84, 1.49)        |
| [2161] Surveyors                                                                             | 9 (282)         | 0.96 (0.50, 1.84)        | -               | -                        | -               | -                        |
| [2163] Draughtsmen                                                                           | 8 (208)         | 1.06 (0.53, 2.12)        | -               | -                        | -               | -                        |
| [2165] Architectural and engineering technologists and technicians                           | 127 (3,709)     | 0.96 (0.81, 1.14)        | 86 (2886)       | 0.92 (0.74, 1.14)        | 41 (823)        | 1.07 (0.79, 1.45)        |
| [2169] Other occupations in architecture and engineering, n.e.c.                             | <5 (20)         | -                        | -               | -                        | -               | -                        |
| <i>[218] Other occupations in mathematics statistics systems analysis and related fields</i> | 50 (1,143)      | 1.11 (0.84, 1.47)        | 28 (632)        | 1.34 (0.93, 1.95)        | 22 (511)        | 0.92 (0.61, 1.39)        |
| [2181] Mathematicians, statisticians and actuaries                                           | <5 (47)         | -                        | -               | -                        | -               | -                        |
| [2183] Systems analysts, computer programmers and related occupations                        | 48 (1,096)      | 1.12(0.84, 1.48)         | 27 (617)        | 1.33 (0.91, 1.93)        | 21 (479)        | 0.93 (0.61, 1.43)        |
| <b>[23] Occupations in social sciences and related fields</b>                                | 542 (11,151)    | <b>1.12 (1.03, 1.22)</b> | 92 (2,335)      | 1.22 (0.99, 1.50)        | 450 (8,816)     | <b>1.09 (1.00, 1.20)</b> |
| <i>[231/234/235/239] Other occupations in social sciences and related fields</i>             | 174 (3,396)     | <b>1.18 (1.02, 1.37)</b> | 30 (783)        | 1.17 (0.82, 1.67)        | 144 (2,613)     | <b>1.19 (1.01, 1.40)</b> |
| [2311] Economists                                                                            | 11 (229)        | 1.17 (0.94, 1.45)        | -               | -                        | -               | -                        |
| [2313] Sociologists, anthropologists and related social scientists                           | <5 (89)         | -                        | -               | -                        | -               | -                        |
| [2315] Psychologists                                                                         | <5 (50)         | -                        | -               | -                        | -               | -                        |
| [2341] Judges and magistrates                                                                | 18 (252)        | 1.10 (0.61, 1.99)        | 8 (118)         | <b>2.09 (1.05, 4.18)</b> | 10 (134)        | 1.65 (0.89, 3.05)        |
| [2343] Lawyers and notaries                                                                  | <5 (94)         | -                        | -               | -                        | -               | -                        |

Table A2. Hazard Ratios for Dermatitis Among Occupation Groups

| Occupation Group*                                                               | Overall         |                          | Male            |                          | Female          |                          |
|---------------------------------------------------------------------------------|-----------------|--------------------------|-----------------|--------------------------|-----------------|--------------------------|
|                                                                                 | Cases (Workers) | HR† (95% CI)             | Cases (Workers) | HR‡ (95% CI)             | Cases (Workers) | HR‡ (95% CI)             |
| [2349] Occupations in law and jurisprudence, n.e.c.                             | <5 (97)         | -                        | -               | -                        | -               | -                        |
| [2350] Supervisors: occupations in library, museum and archival sciences        | <5 (17)         | -                        | -               | -                        | -               | -                        |
| [2351] Librarians and archivists                                                | <5 (180)        | -                        | -               | -                        | -               | -                        |
| [2353] Technicians in library, museum and archival sciences                     | <5 (153)        | -                        | -               | -                        | -               | -                        |
| [2359] Occupations in library, museum and archival sciences, n.e.c.             | <5 (339)        | -                        | -               | -                        | -               | -                        |
| [2391] Educational and vocational counsellors                                   | <5 (364)        | -                        | -               | -                        | -               | -                        |
| [2399] Other occupations in social sciences and related fields, n.e.c.          | 88 (1,532)      | 1.22 (0.58, 2.56)        | 15 (311)        | 1.49 (0.90, 2.47)        | 73 (1221)       | <b>1.29 (1.02, 1.62)</b> |
| <i>[233] Occupations in Social Work and Related Fields</i>                      | 368 (7,755)     | 0.96 (0.58, 1.59)        | 62 (1552)       | 1.24 (0.97, 1.60)        | 306 (6203)      | 1.05 (0.94, 1.18)        |
| [2331] Social workers                                                           | 80 (1,540)      | 1.18 (0.75, 1.85)        | 7 (257)         | 0.82 (0.39, 1.73)        | 73 (1283)       | 1.22 (0.97, 1.54)        |
| [2333] Occupations in welfare and community services                            | 288 (6,216)     | <b>1.33 (1.08, 1.63)</b> | 55 (1295)       | <b>1.33 (1.02, 1.74)</b> | 233 (4921)      | 1.01 (0.88, 1.15)        |
| <b>[27] Teaching and related occupations</b>                                    | 901 (19,039)    | <b>1.07 (1.00, 1.15)</b> | 125 (3,454)     | 1.10 (0.92, 1.31)        | 776 (15,585)    | <b>1.07 (1.00, 1.16)</b> |
| <i>[271] University Teaching and Related Occupations</i>                        | 45 (1,044)      | 0.95 (0.71, 1.28)        | -               | -                        | -               | -                        |
| [2711] University teachers                                                      | <5 (171)        | -                        | -               | -                        | -               | -                        |
| [2719] University teaching and related occupations, n.e.c.                      | 41 (873)        | 1.02 (0.75, 1.39)        | -               | -                        | -               | -                        |
| <i>[273] Elementary and Secondary School Teaching and Related Occupations</i>   | 813 (16,824)    | <b>1.09 (1.02, 1.17)</b> | 107 (2,868)     | 1.13 (0.94, 1.37)        | 706 (13,956)    | <b>1.09 (1.01, 1.18)</b> |
| [2731] Elementary and kindergarten teachers                                     | 374 (7,865)     | 1.07 (0.96, 1.18)        | 53 (1,283)      | 1.25 (0.96, 1.64)        | 321 (6,582)     | 1.05 (0.94, 1.17)        |
| [2733] Secondary school teachers                                                | 142 (2,900)     | <b>1.17 (1.00, 1.39)</b> | 41 (1,040)      | 1.19 (0.88, 1.62)        | 101 (1,860)     | 1.17 (0.96, 1.42)        |
| [2739] Elementary and secondary school teaching and related occupations, n.e.c. | 297 (6,061)     | 1.07 (0.96, 1.21)        | 13 (545)        | 0.73 (0.42, 1.26)        | 284 (5,516)     | 1.11 (0.99, 1.25)        |
| <i>[279] Other Teaching and Related Occupations</i>                             | 43 (1,171)      | 0.88 (0.65, 1.19)        | 14 (433)        | 0.98 (0.58, 1.65)        | 29 (738)        | 0.84 (0.58, 1.21)        |
| [2791] Community college and vocational school teachers                         | 19 (526)        | 0.89 (0.57, 1.40)        | 11 (240)        | 1.38 (0.77, 2.50)        | 8 (286)         | 0.60 (0.30, 1.20)        |

Table A2. Hazard Ratios for Dermatitis Among Occupation Groups

| Occupation Group*                                                 | Overall         |                          | Male            |                          | Female          |                          |
|-------------------------------------------------------------------|-----------------|--------------------------|-----------------|--------------------------|-----------------|--------------------------|
|                                                                   | Cases (Workers) | HR† (95% CI)             | Cases (Workers) | HR‡ (95% CI)             | Cases (Workers) | HR‡ (95% CI)             |
| [2795] Teachers of exceptional students, n.e.c.                   | 13 (194)        | 1.53 (0.89, 2.64)        | -               | -                        | -               | -                        |
| [2799] Other teaching and related occupations, n.e.c.             | 11 (451)        | 0.89 (0.57, 1.40)        | -               | -                        | -               | -                        |
| <b>[31] Occupations in medicine and health</b>                    | 1,777 (42,982)  | <i>0.90 (0.86, 0.95)</i> | 189 (5,355)     | 1.09 (0.95, 1.26)        | 1,588 (37,627)  | <i>0.88 (0.84, 0.93)</i> |
| <i>[311] Health Diagnosing and Treating Occupations</i>           | 6 (195)         | 0.72 (0.32, 1.59)        | -               | -                        | -               | -                        |
| [3111] Physicians and surgeons                                    | <5 (124)        | -                        | -               | -                        | -               | -                        |
| [3113] Dentists                                                   | <5 (9)          | -                        | -               | -                        | -               | -                        |
| [3115] Veterinarians                                              | <5 (53)         | -                        | -               | -                        | -               | -                        |
| [3119] Health diagnosing and treating occupations, n.e.c.         | <5 (9)          | -                        | -               | -                        | -               | -                        |
| <i>[313] Nursing Therapy and Related Assisting Occupations</i>    | 1,506 (37,585)  | <i>0.87 (0.82, 0.92)</i> | 147 (4,520)     | 1.01 (0.85, 1.18)        | 1,359 (33,065)  | <i>0.86 (0.81, 0.91)</i> |
| [3130] Supervisors: nursing occupations                           | 12 (259)        | 0.99 (0.56, 1.75)        | -               | -                        | -               | -                        |
| [3131] Nurses, registered, graduate and nurses-in-training        | 457 (12,011)    | <i>0.81 (0.74, 0.89)</i> | 21 (748)        | 0.85 (0.56, 1.31)        | 436 (11,263)    | <i>0.81 (0.74, 0.90)</i> |
| [3134] Nursing assistants                                         | 134 (4,065)     | <i>0.71 (0.60, 0.84)</i> | 11 (299)        | 1.11 (0.62, 2.01)        | 123 (3,766)     | <i>0.69 (0.58, 0.82)</i> |
| [3135] Nursing aides and orderlies                                | 650 (14,707)    | 0.97 (0.90, 1.05)        | 57 (1,363)      | 1.28 (0.99, 1.66)        | 593 (13,344)    | 0.95 (0.87, 1.03)        |
| [3137] Physiotherapists, occupational and other therapists        | 26 (587)        | 0.98 (0.67, 1.44)        | -               | -                        | -               | -                        |
| [3139] Nursing, therapy and related assisting occupations, n.e.c. | 227 (5,956)     | 0.91 (0.80, 1.04)        | 55 (2,042)      | 0.85 (0.65, 1.11)        | 172 (3,914)     | 0.93 (0.80, 1.09)        |
| <i>[315] Other Occupations in Medicine and Health</i>             | 265 (5,202)     | <b>1.14 (1.01, 1.29)</b> | 41 (774)        | <b>1.62 (1.19, 2.20)</b> | 224 (4,428)     | 1.08 (0.95, 1.24)        |
| [3151] Pharmacists                                                | 8 (181)         | 1.01 (0.51, 2.02)        | 0 (45)          | -                        | 8 (136)         | 1.25 (0.63, 2.50)        |
| [3152] Dietitians and nutritionists                               | 12 (200)        | 1.37 (0.78, 2.40)        | 0 (19)          | -                        | 12 (181)        | 1.47 (0.83, 2.58)        |
| [3154] Dispensing opticians                                       | <5 (27)         | -                        | -               | -                        | -               | -                        |
| [3155] Radiological technologists and technicians                 | 24 (480)        | 1.13 (0.76, 1.69)        | 5 (91)          | 1.66 (0.69, 3.96)        | 19 (389)        | 1.05 (0.67, 1.64)        |
| [3156] Medical laboratory technologists and technicians           | 136 (2,972)     | 1.01 (0.85, 1.19)        | 17 (363)        | 1.44 (0.89, 2.31)        | 119 (2,609)     | 0.97 (0.81, 1.17)        |
| [3157] Dental hygienists, assistants and technicians              | 16 (234)        | 1.60 (0.98, 2.61)        | -               | -                        | -               | -                        |

Table A2. Hazard Ratios for Dermatitis Among Occupation Groups

| Occupation Group*                                                                     | Overall         |                          | Male            |                          | Female          |                          |
|---------------------------------------------------------------------------------------|-----------------|--------------------------|-----------------|--------------------------|-----------------|--------------------------|
|                                                                                       | Cases (Workers) | HR <sup>†</sup> (95% CI) | Cases (Workers) | HR <sup>‡</sup> (95% CI) | Cases (Workers) | HR <sup>‡</sup> (95% CI) |
| [3159] Other occupations in medicine and health, n.e.c.                               | 68 (1,106)      | <b>1.39 (1.09, 1.76)</b> | 16 (203)        | <b>2.45 (1.50, 3.98)</b> | 52 (903)        | 1.23 (0.93, 1.61)        |
| <b>[33] Artistic, literary, recreational and related occupations</b>                  | 248 (5,524)     | <b>1.16 (1.02, 1.32)</b> | 110 (2,807)     | <b>1.24 (1.03, 1.49)</b> | 138 (2,717)     | 1.08 (0.91, 1.28)        |
| <i>[331] Occupations in Fine and Commercial Art Photography and Related Fields</i>    | 30 (728)        | 1.05 (0.73, 1.50)        | 15 (409)        | 1.12 (0.67, 1.85)        | 15 (319)        | 0.98 (0.59, 1.63)        |
| [3311] Painters, sculptors and related artists                                        | <5 (48)         | -                        | -               | -                        | -               | -                        |
| [3313] Product and interior designers                                                 | 11 (167)        | 1.63 (0.90, 2.92)        | -               | -                        | -               | -                        |
| [3314] Advertising and illustrating artists                                           | <5 (138)        | -                        | -               | -                        | -               | -                        |
| [3315] Photographers and cameramen                                                    | 5 (152)         | 0.85 (0.36, 2.05)        | -               | -                        | -               | -                        |
| [3319] Occupations in fine and commercial art, photography and related fields, n.e.c. | 10 (223)        | 1.20 (0.64, 2.22)        | -               | -                        | -               | -                        |
| <i>[333] Occupations in Performing and Audiovisual Arts</i>                           | 32 (860)        | 1.01 (0.72, 1.43)        | 22 (600)        | 1.14 (0.75, 1.73)        | 10 (260)        | 0.82 (0.44, 1.52)        |
| [3330] Producers and directors, performing and audio-visual arts                      | <5 (29)         | -                        | -               | -                        | -               | -                        |
| [3332] Musicians                                                                      | <5 (74)         | -                        | -               | -                        | -               | -                        |
| [3333] Dancers and choreographers                                                     | <5 (17)         | -                        | -               | -                        | -               | -                        |
| [3335] Actors                                                                         | <5 (35)         | -                        | -               | -                        | -               | -                        |
| [3337] Radio and television announcers                                                | <5 (15)         | -                        | -               | -                        | -               | -                        |
| [3339] Occupations in performing and audio-visual arts, n.e.c.                        | 27 (690)        | 1.07 (0.74, 1.57)        | 18 (496)        | 1.12 (0.71, 1.78)        | 9 (194)         | 0.99 (0.51, 1.90)        |
| <i>[335] Occupations in Writing</i>                                                   | 6 (202)         | 0.71 (0.32, 1.57)        | 0 (66)          | -                        | 6 (136)         | 0.96 (0.43, 2.13)        |
| [3352] Writers and editors                                                            | <5 (115)        | -                        | -               | -                        | -               | -                        |
| [3355] Translators and interpreters                                                   | <5 (87)         | -                        | -               | -                        | -               | -                        |
| <i>[337] Occupations in Sport and Recreation</i>                                      | 180 (3,734)     | <b>1.24 (1.07, 1.44)</b> | 73 (1,732)      | <b>1.36 (1.08, 1.71)</b> | 107 (2,002)     | 1.14 (0.94, 1.38)        |
| [3370] Coaches, trainers, instructors and managers, sport and recreation              | 74 (1,605)      | 1.17 (0.93, 1.47)        | 25 (589)        | 1.43 (0.97, 2.12)        | 49 (1,016)      | 1.02 (0.77, 1.36)        |
| [3371] Referees and related officials                                                 | <5 (35)         | -                        | -               | -                        | -               | -                        |
| [3373] Athletes                                                                       | <5 (13)         | -                        | -               | -                        | -               | -                        |
| [3375] Attendants, sport and recreation                                               | 101 (2,041)     | <b>1.28 (1.06, 1.56)</b> | 47 (1,087)      | <b>1.36 (1.02, 1.81)</b> | 54 (954)        | 1.21 (0.93, 1.58)        |

Table A2. Hazard Ratios for Dermatitis Among Occupation Groups

| Occupation Group*                                                                   | Overall         |                          | Male            |                   | Female          |                          |
|-------------------------------------------------------------------------------------|-----------------|--------------------------|-----------------|-------------------|-----------------|--------------------------|
|                                                                                     | Cases (Workers) | HR† (95% CI)             | Cases (Workers) | HR‡ (95% CI)      | Cases (Workers) | HR‡ (95% CI)             |
| [3379] Occupations in sport and recreation, n.e.c.                                  | <5 (40)         | -                        | -               | -                 | -               | -                        |
| <b>[41] Clerical and related occupations</b>                                        | 2,042 (48,636)  | 1.03 (0.98, 1.08)        | 696 (20,742)    | 1.03 (0.95, 1.11) | 1,346 (27,894)  | 1.04 (0.98, 1.10)        |
| <i>[411] Stenographic and Typing Occupations</i>                                    | 79 (1,751)      | 0.95 (0.76, 1.19)        | 0 (44)          | -                 | 79 (1,707)      | 0.99 (0.80, 1.24)        |
| [4111] Secretaries and stenographers                                                | 71 (1,563)      | 0.96 (0.76, 1.21)        | 0 (36)          | -                 | 71 (1,527)      | 1.00 (0.79, 1.26)        |
| [4113] Typists and clerk-typists                                                    | 8 (188)         | 0.90 (0.45, 1.79)        | 0 (8)           | -                 | 8 (180)         | 0.95 (0.47, 1.89)        |
| <i>[413] Bookkeepers, Tellers and Cashiers, and other clerks</i>                    | 427 (9,208)     | 1.04 (0.95, 1.15)        | 44 (1,401)      | 0.98 (0.73, 1.31) | 383 (7,807)     | 1.05 (0.95, 1.16)        |
| [4130] Supervisors: bookkeeping, account-recording and related occupations          | 6 (212)         | 0.63 (0.28, 1.40)        | 0 (39)          | -                 | 6 (173)         | 0.74 (0.33, 1.64)        |
| [4131] Bookkeepers and accounting clerks                                            | 24 (504)        | 1.00 (0.67, 1.50)        | -               | -                 | -               | -                        |
| [4133] Tellers and cashiers                                                         | 299 (6,429)     | 1.04 (0.93, 1.17)        | 24 (752)        | 1.02 (0.68, 1.52) | 275 (5,677)     | 1.03 (0.92, 1.17)        |
| [4135] Insurance, bank and other finance clerks                                     | 10 (277)        | 0.81 (0.44, 1.51)        | -               | -                 | -               | -                        |
| [4137] Statistical clerks                                                           | 19 (596)        | 0.84 (0.53, 1.31)        | 13 (392)        | 1.00 (0.58, 1.73) | 6 (204)         | 0.62 (0.28, 1.38)        |
| [4139] Bookkeeping, account-recording and related occupations, n.e.c.               | 69 (1,191)      | <b>1.27 (1.01, 1.61)</b> | 5 (135)         | 1.14 (0.48, 2.72) | 64 (1,056)      | <b>1.31 (1.02, 1.67)</b> |
| <i>[414] Office Machine and Electronic Data Processing Equipment Operators</i>      | 38 (637)        | 1.37 (0.99, 1.87)        | 7 (132)         | 1.67 (0.80, 3.49) | 31 (505)        | 1.32 (0.93, 1.88)        |
| [4143] Electronic data-processing equipment operators                               | 38 (637)        | 1.37 (0.99, 1.87)        | 7 (132)         | 1.67 (0.80, 3.49) | 31 (505)        | 1.32 (0.93, 1.88)        |
| <i>[415] Material Recording Scheduling and Distributing Occupations</i>             | 439 (12,983)    | 0.94 (0.86, 1.03)        | 323 (10,080)    | 0.98 (0.88, 1.10) | 116 (2,903)     | 0.84 (0.70, 1.01)        |
| [4150] Supervisors: material recording, scheduling and distributing occupations     | 50 (1,275)      | 1.08 (0.82, 1.43)        | 37 (960)        | 1.17 (0.84, 1.61) | 13 (315)        | 0.89 (0.52, 1.52)        |
| [4151] Production clerks                                                            | 34 (651)        | 1.33 (0.95, 1.87)        | 18 (367)        | 1.50 (0.94, 2.37) | 16 (284)        | 1.19 (0.73, 1.95)        |
| [4153] Shipping and receiving clerks                                                | 255 (8,489)     | 0.85 (0.75, 0.97)        | 203 (7,031)     | 0.89 (0.77, 1.02) | 52 (1,458)      | 0.75 (0.57, 0.99)        |
| [4155] Stock clerks and related occupations                                         | 100 (2,568)     | 1.04 (0.86, 1.27)        | 65 (1,722)      | 1.16 (0.91, 1.48) | 35 (846)        | 0.88 (0.63, 1.22)        |
| <i>[416] Library File and Correspondence Clerks and Related Occupations</i>         | 11 (272)        | 0.89 (0.49, 1.60)        | -               | -                 | -               | -                        |
| [4160] Supervisors: library, file and correspondence clerks and related occupations | <5 (59)         | -                        | -               | -                 | -               | -                        |
| [4161] Library and file clerks                                                      | 9 (213)         | 0.92 (0.48, 1.77)        | -               | -                 | -               | -                        |

Table A2. Hazard Ratios for Dermatitis Among Occupation Groups

| Occupation Group*                                                                     | Overall         |                          | Male            |                          | Female          |                          |
|---------------------------------------------------------------------------------------|-----------------|--------------------------|-----------------|--------------------------|-----------------|--------------------------|
|                                                                                       | Cases (Workers) | HR <sup>†</sup> (95% CI) | Cases (Workers) | HR <sup>‡</sup> (95% CI) | Cases (Workers) | HR <sup>‡</sup> (95% CI) |
| [4170/1/5/7/9] Other Reception Information Mail And Message Distribution Occupations  | 140 (3,520)     | <b>1.09 (1.00, 1.18)</b> | 65 (1,897)      | 1.03 (0.81, 1.32)        | 75 (1,623)      | 0.99 (0.79, 1.24)        |
| [4170] Supervisors: reception, information, mail and message distribution occupations | 10 (154)        | 1.59 (0.85, 2.95)        | -               | -                        | -               | -                        |
| [4171] Receptionists and information clerks                                           | 37 (1,074)      | 0.74 (0.54, 1.02)        | 0 (59)          | -                        | 37 (1,015)      | 0.78 (0.57, 1.08)        |
| [4175] Telephone operators                                                            | 7 (91)          | 1.74 (0.83, 3.65)        | -               | -                        | -               | -                        |
| [4177] Messengers                                                                     | 86 (2,200)      | 1.09 (0.89, 1.35)        | 62 (1,765)      | 1.06 (0.83, 1.36)        | 24 (435)        | 1.17 (0.79, 1.75)        |
| [4172] Mail carriers                                                                  | 156 (4,302)     | 0.93 (0.79, 1.09)        | 81 (2,496)      | 0.97 (0.78, 1.21)        | 75 (1,806)      | 0.88 (0.70, 1.10)        |
| [4172] Mail carriers                                                                  | 156 (4,302)     | 0.93 (0.79, 1.09)        | 81 (2,496)      | 0.97 (0.78, 1.21)        | 75 (1,806)      | 0.88 (0.70, 1.10)        |
| [4173] Mail and postal clerks                                                         | 129 (2,668)     | 1.18 (0.99, 1.41)        | 49 (1,186)      | 1.25 (0.94, 1.65)        | 80 (1,482)      | 1.16 (0.93, 1.44)        |
| [4173] Mail and postal clerks                                                         | 129 (2,668)     | 1.18 (0.99, 1.41)        | 49 (1,186)      | 1.25 (0.94, 1.65)        | 80 (1,482)      | 1.16 (0.93, 1.44)        |
| [419] Other clerical and related occupations                                          | 623 (13,299)    | 0.95 (0.76, 1.19)        | 125 (3,470)     | 1.11 (0.93, 1.32)        | 498 (9,829)     | <b>1.09 (1.00, 1.19)</b> |
| [4190] Supervisors: other clerical and related occupations, n.e.c.                    | 8 (265)         | 0.69 (0.34, 1.37)        | -               | -                        | -               | -                        |
| [4191] Collectors                                                                     | 11 (246)        | 1.06 (0.58, 1.91)        | -               | -                        | -               | -                        |
| [4192] Adjusters, claim                                                               | 5 (90)          | 1.26 (0.53, 3.03)        | 0 (23)          | -                        | 5 (67)          | 1.60 (0.67, 3.83)        |
| [4193] Travel clerks, ticket, station and freight agents                              | 59 (1,166)      | 1.23 (0.95, 1.59)        | 19 (434)        | 1.36 (0.87, 2.13)        | 40 (732)        | 1.17 (0.86, 1.60)        |
| [4194] Hotel clerks                                                                   | 19 (399)        | 1.16 (0.74, 1.81)        | 6 (130)         | 1.48 (0.66, 3.28)        | 13 (269)        | 1.04 (0.60, 1.79)        |
| [4195] Personnel clerks                                                               | 6 (167)         | 0.77 (0.35, 1.72)        | -               | -                        | -               | -                        |
| [4197] General office clerks                                                          | 156 (3,340)     | 1.01 (0.86, 1.18)        | 10 (288)        | 1.07 (0.58, 1.99)        | 146 (3,052)     | 1.03 (0.87, 1.21)        |
| [4199] Other clerical and related occupations, n.e.c.                                 | 359 (7,623)     | <b>1.12 (1.01, 1.24)</b> | 87 (2,430)      | 1.10 (0.89, 1.36)        | 272 (5,193)     | <b>1.12 (1.00, 1.27)</b> |
| <b>[51] Sales occupations</b>                                                         | 1,914 (49,574)  | 0.97 (0.92, 1.01)        | 730 (23,032)    | 1.00 (0.93, 1.08)        | 1,184 (26,542)  | 0.94 (0.89, 1.00)        |
| <i>[513/514] Sales Occupations Commodities</i>                                        | 1,814 (46,661)  | 0.97 (0.93, 1.02)        | 701 (21,874)    | 1.02 (0.94, 1.10)        | 1,113 (24,787)  | 0.95 (0.89, 1.01)        |
| [5130] Supervisors: sales occupations, commodities                                    | 294 (8,034)     | 0.88 (0.79, 0.99)        | 88 (3,095)      | 0.86 (0.70, 1.06)        | 206 (4,939)     | 0.88 (0.77, 1.01)        |
| [5131] Technical salesmen and related advisers                                        | 14 (377)        | 0.97 (0.58, 1.64)        | -               | -                        | -               | -                        |
| [5135] Salesmen and salespersons, commodities, n.e.c.                                 | 1,497 (37,914)  | 1.00 (0.95, 1.05)        | 596 (18,297)    | 1.04 (0.96, 1.13)        | 901 (19,617)    | 0.98 (0.91, 1.05)        |
| [5145] Service station attendants                                                     | 9 (336)         | 0.74 (0.38, 1.42)        | -               | -                        | -               | -                        |

Table A2. Hazard Ratios for Dermatitis Among Occupation Groups

| Occupation Group*                                                            | Overall               |                          | Male                  |                          | Female                |                          |
|------------------------------------------------------------------------------|-----------------------|--------------------------|-----------------------|--------------------------|-----------------------|--------------------------|
|                                                                              | Cases (Workers)       | HR <sup>†</sup> (95% CI) | Cases (Workers)       | HR <sup>‡</sup> (95% CI) | Cases (Workers)       | HR <sup>‡</sup> (95% CI) |
| <i>[519] Other Sales Occupations</i>                                         | 98 (2,764)            | 0.87 (0.72, 1.06)        | 29 (1,101)            | 0.85 (0.59, 1.22)        | 69 (1,663)            | 0.89 (0.70, 1.13)        |
| [5191] Buyers, wholesale and retail trade                                    | 57 (1,690)            | 0.82 (0.63, 1.06)        | 12 (650)              | 0.59 (0.34, 1.04)        | 45 (1,040)            | 0.92 (0.69, 1.24)        |
| [5199] Other sales occupations, n.e.c.                                       | 41 (1,074)            | 0.97 (0.71, 1.31)        | 17 (451)              | 1.23 (0.77, 1.98)        | 24 (623)              | 0.84 (0.56, 1.25)        |
| <b>[61] Service occupations</b>                                              | <b>3,996 (97,397)</b> | <b>1.04 (1.01, 1.08)</b> | <b>1,619 (46,697)</b> | <b>1.10 (1.04, 1.16)</b> | <b>2,377 (50,700)</b> | <b>1.00 (0.96, 1.05)</b> |
| <i>[6111] Fire-fighting occupations</i>                                      | 105 (3,329)           | 0.95 (0.78, 1.15)        | 99 (3,142)            | 0.97 (0.79, 1.18)        | 6 (187)               | 0.67 (0.30, 1.50)        |
| [6111] Fire-fighting occupations                                             | 105 (3,329)           | 0.95 (0.78, 1.15)        | 99 (3,142)            | 0.97 (0.79, 1.18)        | 6 (187)               | 0.67 (0.30, 1.50)        |
| [6112/3] Police and detectives                                               | 226 (7,077)           | 0.91 (0.79, 1.03)        | 171 (5,684)           | 0.94 (0.81, 1.09)        | 55 (1,393)            | 0.83 (0.64, 1.08)        |
| [6112] Policemen and detectives, government                                  | 213 (6,699)           | 0.90 (0.79, 1.04)        | 161 (5,424)           | 0.93 (0.79, 1.08)        | 52 (1,275)            | 0.86 (0.66, 1.13)        |
| [6113] Policemen and investigators, private                                  | 13 (378)              | 0.93 (0.54, 1.60)        | -                     | -                        | -                     | -                        |
| [6115/9] Other protective service occupations                                | 247 (6,216)           | 1.09 (0.96, 1.24)        | 151 (4,306)           | 1.10 (0.94, 1.29)        | 96 (1,910)            | 1.08 (0.88, 1.32)        |
| [6115] Guards and watchmen                                                   | 247 (6,087)           | 1.12 (0.98, 1.26)        | 151 (4,207)           | 1.13 (0.96, 1.32)        | 96 (1,880)            | 1.09 (0.90, 1.34)        |
| [6123/5] Waiters, hostesses, stewards, and bartenders, food and beverage     | 308 (7,092)           | 1.02 (0.91, 1.14)        | 58 (1,540)            | 1.21 (0.93, 1.57)        | 250 (5,552)           | 0.96 (0.84, 1.08)        |
| [6123] Bartenders                                                            | 44 (1,064)            | 1.02 (0.76, 1.37)        | 10 (387)              | 0.83 (0.45, 1.55)        | 34 (677)              | 1.07 (0.76, 1.50)        |
| [6125] Waiters, hostesses and stewards, food and beverage                    | 264 (6,028)           | 1.02 (0.90, 1.15)        | 48 (1,153)            | <b>1.34 (1.01, 1.77)</b> | 216 (4,875)           | 0.94 (0.82, 1.08)        |
| [6129] Food and beverage preparation and related service occupations, n.e.c. | 641 (13,974)          | <b>1.14 (1.05, 1.24)</b> | 196 (5,267)           | <b>1.24 (1.07, 1.42)</b> | 445 (8,707)           | <b>1.10 (1.00, 1.20)</b> |
| <i>[613] Occupations in lodging and other accommodation</i>                  | 29 (625)              | 1.22 (0.85, 1.76)        | 18 (380)              | 1.47 (0.93, 2.34)        | 11 (245)              | 0.96 (0.53, 1.73)        |
| [6130] Supervisors: occupations in lodging and other accommodation           | 5 (154)               | 0.79 (0.33, 1.91)        | -                     | -                        | -                     | -                        |
| [6139] Occupations in lodging and other accommodation, n.e.c.                | 24 (471)              | 1.37 (0.92, 2.05)        | 14 (315)              | 1.38 (0.82, 2.33)        | 10 (156)              | 1.38 (0.74, 2.56)        |
| [6141/4/5/7/9] Other personal service occupations                            | 643 (12,996)          | <b>1.09 (1.01, 1.18)</b> | 52 (1,058)            | <b>1.53 (1.17, 2.01)</b> | 591 (11,938)          | 1.06 (0.98, 1.16)        |
| [6144] Guides                                                                | <5 (77)               | -                        | -                     | -                        | -                     | -                        |
| [6145] Hostesses and stewards, except food and beverage                      | 51 (1,041)            | 1.15 (0.87, 1.51)        | 15 (210)              | <b>2.29 (1.38, 3.80)</b> | 36 (831)              | 0.93 (0.67, 1.29)        |
| [6147] Babysitters                                                           | 32 (535)              | 1.34 (0.95, 1.89)        | -                     | -                        | -                     | -                        |
| [6149] Personal service occupations, n.e.c.                                  | 555 (11,323)          | 1.07 (0.98, 1.17)        | 35 (783)              | 1.37 (0.99, 1.91)        | 520 (10,540)          | 1.06 (0.97, 1.16)        |

Table A2. Hazard Ratios for Dermatitis Among Occupation Groups

| Occupation Group*                                                                              | Overall         |                          | Male            |                          | Female          |                          |
|------------------------------------------------------------------------------------------------|-----------------|--------------------------|-----------------|--------------------------|-----------------|--------------------------|
|                                                                                                | Cases (Workers) | HR† (95% CI)             | Cases (Workers) | HR‡ (95% CI)             | Cases (Workers) | HR‡ (95% CI)             |
| [6143] Barbers, hairdressers and related occupations                                           | 25 (376)        | <b>1.49 (1.00, 2.20)</b> | 0 (20)          | -                        | 25 (356)        | <b>1.55 (1.05, 2.29)</b> |
| [6162/5] Laundering, dry cleaning and pressing occupations                                     | 64 (1,624)      | 0.90 (0.70, 1.15)        | 10 (419)        | 0.73 (0.39, 1.35)        | 54 (1,205)      | 0.96 (0.74, 1.25)        |
| [6162] Laundering and dry cleaning occupations                                                 | 58 (1,441)      | 0.92 (0.71, 1.19)        | 10 (363)        | 0.85 (0.45, 1.57)        | 48 (1,078)      | 0.95 (0.72, 1.27)        |
| [6165] Pressing occupations                                                                    | 6 (183)         | 0.76 (0.34, 1.69)        | 0 (56)          | -                        | 6 (127)         | 1.02 (0.46, 2.27)        |
| [6191] Janitors, charworkers and cleaners                                                      | 972 (24,942)    | 0.99 (0.92, 1.05)        | 452 (13,176)    | 1.04 (0.94, 1.14)        | 520 (11,766)    | 0.95 (0.87, 1.03)        |
| <b>[71] Farming, horticultural and animal husbandry occupations</b>                            | 370 (12,299)    | 0.85 (0.76, 0.94)        | 252 (9,237)     | <i>0.86 (0.76, 0.98)</i> | 118 (3,062)     | <i>0.81 (0.68, 0.98)</i> |
| <i>[7180/7197/7199] Foremen: other farming, horticultural and animal husbandry occupations</i> | 53 (1,616)      | 0.85 (0.65, 1.11)        | 20 (842)        | 0.74 (0.48, 1.14)        | 33 (774)        | 0.91 (0.65, 1.28)        |
| [7180] Foremen: other farming, horticultural and animal husbandry occupations                  | 22 (817)        | 0.76 (0.50, 1.16)        | 13 (644)        | 0.63 (0.36, 1.08)        | 9 (173)         | 1.11 (0.58, 2.14)        |
| [7199] Other farming, horticultural and animal husbandry occupations, n.e.c.                   | 31 (799)        | 0.93 (0.65, 1.32)        | 7 (198)         | 1.12 (0.53, 2.34)        | 24 (601)        | 0.85 (0.57, 1.27)        |
| <i>[7182/7195] Farm, nursery and related workers</i>                                           | 306 (10,258)    | <i>0.85 (0.76, 0.95)</i> | 226 (8,085)     | 0.89 (0.78, 1.02)        | 80 (2,173)      | <i>0.78 (0.62, 0.97)</i> |
| [7182] Farm workers                                                                            | 98 (4,200)      | <i>0.66 (0.54, 0.80)</i> | 65 (3,177)      | <i>0.64 (0.50, 0.82)</i> | 33 (1,023)      | <i>0.68 (0.48, 0.96)</i> |
| [7195] Nursery and related workers                                                             | 208 (6,058)     | 1.00 (0.87, 1.14)        | 161 (4,908)     | 1.06 (0.91, 1.24)        | 47 (1,150)      | 0.87 (0.65, 1.15)        |
| <i>[7112/7131] Farmers And Farm Management Occupations</i>                                     | 11 (425)        | 0.71 (0.40, 1.29)        | 6 (310)         | 0.60 (0.27, 1.33)        | 5 (115)         | 0.92 (0.39, 2.22)        |
| [7112] Farmers                                                                                 | 11 (425)        | 0.71 (0.40, 1.29)        | 6 (310)         | 0.60 (0.27, 1.33)        | 5 (115)         | 0.92 (0.39, 2.22)        |
| <b>[75] Forestry and logging occupations</b>                                                   | 36 (1,154)      | 0.93 (0.67, 1.28)        | 29 (1,047)      | 0.85 (0.59, 1.23)        | 7 (107)         | 1.42 (0.68, 2.97)        |
| <i>[751] Forestry and Logging Occupations</i>                                                  | 36 (1,154)      | 0.93 (0.67, 1.28)        | 29 (1,047)      | 0.85 (0.59, 1.23)        | 7 (107)         | 1.42 (0.68, 2.97)        |
| [7510] Foremen: forestry and logging occupations                                               | <5 (33)         | -                        | -               | -                        | -               | -                        |
| [7511] Forestry conservation occupations                                                       | 6 (190)         | 0.94 (0.42, 2.10)        | -               | -                        | -               | -                        |
| [7513] Timber cutting and related occupations                                                  | 8 (334)         | 0.72 (0.36, 1.45)        | 8 (329)         | 0.74 (0.37, 1.48)        | 0 (5)           | -                        |
| [7517] Log hoisting, sorting, moving and related occupations                                   | 9 (254)         | 1.07 (0.55, 2.05)        | -               | -                        | -               | -                        |
| [7518] Occupations in labouring and other elemental work, forestry and logging                 | 12 (343)        | 1.01 (0.57, 1.78)        | -               | -                        | -               | -                        |



Table A2. Hazard Ratios for Dermatitis Among Occupation Groups

| Occupation Group*                                                                                              | Overall         |                   | Male            |                          | Female          |                   |
|----------------------------------------------------------------------------------------------------------------|-----------------|-------------------|-----------------|--------------------------|-----------------|-------------------|
|                                                                                                                | Cases (Workers) | HR† (95% CI)      | Cases (Workers) | HR‡ (95% CI)             | Cases (Workers) | HR‡ (95% CI)      |
| <b>[77] Mining and quarrying including oil and gas field occupations</b>                                       | 54 (1,870)      | 0.88 (0.67, 1.14) | 54 (1827)       | 0.91 (0.69, 1.18)        | 0 (43)          | -                 |
| <i>[7710/7/8/9] Other Mining And Quarrying Including Oil And Gas Field Occupations (Old 3-digit code: 771)</i> | 51 (1,745)      | 0.89 (0.67, 1.17) | 51 (1703)       | 0.92 (0.70, 1.21)        | 0 (42)          | -                 |
| [7710] Foremen: mining and quarrying including oil and gas field occupations                                   | <5 (88)         | -                 | -               | -                        | -               | -                 |
| [7717] Mining and quarrying: cutting, handling and loading occupations                                         | 6 (283)         | 0.66 (0.30, 1.46) | 6 (271)         | 0.70 (0.31, 1.55)        | 0 (10)          | -                 |
| [7718] Occupations in labouring and other elemental work, mining and quarrying including oil and gas fields    | 5 (139)         | 1.08 (0.45, 2.60) | 5 (129)         | 1.24 (0.52, 2.96)        | 0 (12)          | -                 |
| [7719] Mining and quarrying including oil and gas field occupations, n.e.c.                                    | 38 (1,235)      | 0.93 (0.68, 1.28) | 38 (1219)       | 0.95 (0.69, 1.3)         | 0 (16)          | -                 |
| <i>[7711/3/5] Drilling And Blasting Occupations</i>                                                            | <5 (125)        | -                 | -               | -                        | -               | -                 |
| <b>[81] Processing occupations</b>                                                                             | 534 (13,894)    | 1.06 (0.97, 1.15) | 349 (10,390)    | 1.02 (0.92, 1.14)        | 185 (3,504)     | 1.13 (0.97, 1.30) |
| <i>[813/814] Metal Processing and Related Occupations</i>                                                      | 139 (4,438)     | 0.92 (0.78, 1.09) | 117 (4,030)     | 0.88 (0.73, 1.06)        | 22 (408)        | 1.16 (0.76, 1.76) |
| [8130] Foremen: metal processing and related occupations                                                       | 5 (222)         | 0.67 (0.28, 1.60) | 5 (205)         | 0.73 (0.31, 1.76)        | 0 (17)          | -                 |
| [8137] Moulding, coremaking and metal casting occupations                                                      | 23 (868)        | 0.78 (0.52, 1.17) | -               | -                        | -               | -                 |
| [8143] Plating, metal spraying and related occupations                                                         | 15 (398)        | 1.08 (0.65, 1.80) | -               | -                        | -               | -                 |
| [8149] Metal processing and related occupations, n.e.c.                                                        | 96 (2,950)      | 0.96 (0.78, 1.17) | 80 (2,696)      | 0.90 (0.73, 1.13)        | 16 (254)        | 1.38 (0.84, 2.25) |
| <i>[815] Clay Glass and Stone Processing Forming and Related Occupations</i>                                   | 15 (633)        | 0.72 (0.43, 1.19) | -               | -                        | -               | -                 |
| [8155] Forming occupations: clay, glass and stone                                                              | 15 (633)        | 0.72 (0.43, 1.19) | -               | -                        | -               | -                 |
| <i>[816/817] Chemicals Petroleum Rubber Plastic and Related Materials Processing Occupations</i>               | 380 (8,823)     | 1.15 (1.03, 1.27) | 218 (5,758)     | <b>1.16 (1.02, 1.33)</b> | 162 (3,065)     | 1.13 (0.96, 1.32) |

Table A2. Hazard Ratios for Dermatitis Among Occupation Groups

| Occupation Group*                                                                                                                | Overall         |                          | Male            |                          | Female          |                   |
|----------------------------------------------------------------------------------------------------------------------------------|-----------------|--------------------------|-----------------|--------------------------|-----------------|-------------------|
|                                                                                                                                  | Cases (Workers) | HR† (95% CI)             | Cases (Workers) | HR‡ (95% CI)             | Cases (Workers) | HR‡ (95% CI)      |
| [8160] Foremen: chemicals, petroleum, rubber, plastic and related materials processing occupations                               | 5 (113)         | 1.22 (0.51, 2.93)        | -               | -                        | -               | -                 |
| [8178] Occupations in labouring and other elemental work: chemicals, petroleum, rubber, plastic and related materials processing | 97 (2,298)      | 1.13 (0.92, 1.37)        | 58 (1,493)      | 1.21 (0.93, 1.56)        | 39 (805)        | 1.03 (0.75, 1.41) |
| [8179] Chemicals, petroleum, rubber, plastic and related materials processing occupations, n.e.c.                                | 278 (6,412)     | <b>1.15 (1.02, 1.29)</b> | 157 (4,183)     | 1.14 (0.98, 1.34)        | 121 (2,229)     | 1.16 (0.97, 1.38) |
| <b>[82] Processing occupations</b>                                                                                               | 859 (20,697)    | <b>1.09 (1.02, 1.17)</b> | 473 (12,813)    | <b>1.14 (1.04, 1.25)</b> | 386 (7,884)     | 1.04 (0.94, 1.15) |
| <i>[821/822] Food and Beverage and Related Processing Occupations</i>                                                            | 638 (14,678)    | <b>1.12 (1.04, 1.21)</b> | 318 (8,183)     | <b>1.21 (1.08, 1.35)</b> | 320 (6,495)     | 1.05 (0.94, 1.17) |
| [8210] Foremen: food, beverage and related processing occupations                                                                | 9 (366)         | 0.65 (0.34, 1.24)        | -               | -                        | -               | -                 |
| [8213] Baking, confectionery making and related occupations                                                                      | 70 (1,808)      | 0.94 (0.75, 1.19)        | 22 (686)        | 1.01 (0.66, 1.53)        | 48 (1,122)      | 0.91 (0.69, 1.21) |
| [8215] Slaughtering and meat cutting, canning, curing and packing occupations                                                    | 82 (2,038)      | 1.11 (0.90, 1.38)        | 53 (1,508)      | 1.09 (0.84, 1.43)        | 29 (530)        | 1.16 (0.81, 1.67) |
| [8217] Fish canning, curing and packing occupations                                                                              | <5 (181)        | -                        | -               | -                        | -               | -                 |
| [8226] Inspecting, testing, grading and sampling occupations: food, beverage and related processing                              | 16 (444)        | 0.88 (0.54, 1.44)        | 9 (198)         | 1.38 (0.72, 2.65)        | 7 (246)         | 0.61 (0.29, 1.27) |
| [8228] Occupations in labouring and other elemental work: food, beverage and related processing                                  | 342 (7,192)     | <b>1.21 (1.09, 1.35)</b> | 164 (3,746)     | <b>1.37 (1.18, 1.60)</b> | 178 (3,446)     | 1.10 (0.95, 1.28) |
| [8229] Food, beverage and related processing occupations, n.e.c.                                                                 | 117 (2,649)     | 1.17 (0.98, 1.40)        | 68 (1,735)      | 1.20 (0.94, 1.52)        | 49 (914)        | 1.14 (0.86, 1.51) |
| <i>[823] Wood Processing Occupations Except Paper Pulp</i>                                                                       | 16 (751)        | 0.61 (0.38, 1.00)        | -               | -                        | -               | -                 |
| [8231] Sawmill sawyers and related occupations                                                                                   | 7 (413)         | 0.50 (0.24, 1.04)        | -               | -                        | -               | -                 |
| [8236] Inspecting, testing, grading and sampling occupations: wood processing, except pulp and papermaking                       | <5 (93)         | -                        | -               | -                        | -               | -                 |

Table A2. Hazard Ratios for Dermatitis Among Occupation Groups

| Occupation Group*                                                                | Overall         |                          | Male            |                          | Female          |                          |
|----------------------------------------------------------------------------------|-----------------|--------------------------|-----------------|--------------------------|-----------------|--------------------------|
|                                                                                  | Cases (Workers) | HR <sup>†</sup> (95% CI) | Cases (Workers) | HR <sup>‡</sup> (95% CI) | Cases (Workers) | HR <sup>‡</sup> (95% CI) |
| [8239] Wood processing occupations, except pulp and papermaking, n.e.c.          | 8 (245)         | 0.93 (0.46, 1.85)        | 8 (207)         | 1.17 (0.58, 2.33)        | 0 (38)          | -                        |
| <i>[825] Pulp and Papermaking and Related Occupations</i>                        | 22 (645)        | 0.96 (0.63, 1.45)        | -               | -                        | -               | -                        |
| [8250] Foremen: pulp and papermaking and related occupations                     | <5 (99)         | -                        | -               | -                        | -               | -                        |
| [8251] Cellulose pulp preparing occupations                                      | 6 (170)         | 0.99 (0.45, 2.21)        | 6 (143)         | 1.25 (0.56, 2.78)        | 0 (27)          | -                        |
| [8253] Papermaking and finishing occupations                                     | 15 (376)        | 1.11 (0.67, 1.83)        | -               | -                        | -               | -                        |
| <i>[826/827] Textile Processing Occupations</i>                                  | 54 (1,389)      | 0.98 (0.75, 1.28)        | 17 (741)        | 0.69 (0.43, 1.11)        | 37 (648)        | 1.22 (0.89, 1.69)        |
| [8260] Foremen: textile processing occupations                                   | <5 (38)         | -                        | -               | -                        | -               | -                        |
| [8267] Textile weaving occupations                                               | 11 (318)        | 0.84 (0.47, 1.52)        | -               | -                        | -               | -                        |
| [8276] Inspecting, testing, grading and sampling occupations, textile processing | <5 (81)         | -                        | -               | -                        | -               | -                        |
| [8278] Occupations in labouring and other elemental work, textile processing     | 31 (771)        | 1.03 (0.72, 1.46)        | 10 (432)        | 0.70 (0.38, 1.30)        | 21 (339)        | 1.34 (0.88, 2.06)        |
| [8279] Textile processing occupations, n.e.c.                                    | 6 (182)         | 0.85 (0.38, 1.89)        | -               | -                        | -               | -                        |
| <i>[829] Other Processing Occupations</i>                                        | 129 (3,234)     | 1.15 (0.97, 1.37)        | 106 (2,714)     | <b>1.21 (1.00, 1.47)</b> | 23 (520)        | 0.94 (0.62, 1.41)        |
| [8293] Tobacco processing occupations                                            | <5 (26)         | -                        | -               | -                        | -               | -                        |
| [8298] Occupations in labouring and other elemental work, other processing       | 128 (3,182)     | 1.16 (0.97, 1.38)        | 106 (2,675)     | <b>1.23 (1.02, 1.49)</b> | 22 (507)        | 0.92 (0.61, 1.40)        |
| <b>[83] Machining and related occupations</b>                                    | 1,177 (30,682)  | <b>1.13 (1.06, 1.20)</b> | 1,008 (27,290)  | <b>1.14 (1.07, 1.21)</b> | 169 (3,392)     | 1.06 (0.91, 1.24)        |
| <i>[831] Metal Machining Occupations</i>                                         | 286 (6,712)     | <b>1.28 (1.14, 1.43)</b> | 262 (6,303)     | <b>1.27 (1.12, 1.44)</b> | 24 (409)        | 1.25 (0.84, 1.87)        |
| [8310] Foremen: metal machining occupations                                      | 11 (179)        | <b>1.83 (1.02, 3.31)</b> | -               | -                        | -               | -                        |
| [8311] Tool and die making occupations                                           | 74 (1,814)      | 1.23 (0.98, 1.54)        | 74 (1,745)      | <b>1.30 (1.03, 1.63)</b> | 0 (69)          | -                        |
| [8313] Machinist and machine tool setting-up occupations                         | 117 (2,710)     | <b>1.29 (1.08, 1.55)</b> | 106 (2,566)     | <b>1.25 (1.04, 1.52)</b> | 11 (144)        | 1.68 (0.93, 3.02)        |
| [8315] Machine tool operating occupations                                        | 84 (2,009)      | <b>1.24 (1.00, 1.53)</b> | 72 (1,827)      | 1.20 (0.95, 1.52)        | 12 (182)        | 1.41 (0.80, 2.48)        |
| <i>[833] Metal Shaping and Forming Occupations Except Machining</i>              | 791 (21,355)    | <b>1.08 (1.01, 1.16)</b> | 659 (18,740)    | <b>1.08 (1.00, 1.17)</b> | 132 (2,615)     | 1.08 (0.91, 1.28)        |
| [8330] Foremen: metal shaping and forming occupations, except machining          | 6 (226)         | 0.79 (0.36, 1.76)        | -               | -                        | -               | -                        |

Table A2. Hazard Ratios for Dermatitis Among Occupation Groups

| Occupation Group*                                                                                                           | Overall         |                          | Male            |                          | Female          |                          |
|-----------------------------------------------------------------------------------------------------------------------------|-----------------|--------------------------|-----------------|--------------------------|-----------------|--------------------------|
|                                                                                                                             | Cases (Workers) | HR <sup>†</sup> (95% CI) | Cases (Workers) | HR <sup>‡</sup> (95% CI) | Cases (Workers) | HR <sup>‡</sup> (95% CI) |
| [8331] Forging occupations                                                                                                  | 15 (503)        | 0.87 (0.52, 1.44)        | -               | -                        | -               | -                        |
| [8333] Sheet metal workers                                                                                                  | 34 (1,117)      | 0.93 (0.67, 1.31)        | 34 (1094)       | 0.97 (0.69, 1.35)        | 0 (23)          | -                        |
| [8334] Metalworking-machine operators, n.e.c.                                                                               | 309 (7,502)     | <b>1.16 (1.03, 1.29)</b> | 233 (6,007)     | <b>1.18 (1.04, 1.34)</b> | 76 (1,495)      | 1.08 (0.86, 1.35)        |
| [8335] Welding and flame cutting occupations                                                                                | 235 (6,703)     | 1.05 (0.93, 1.20)        | 216 (6,282)     | 1.07 (0.93, 1.22)        | 19 (421)        | 0.96 (0.61, 1.51)        |
| [8337] Boilermakers, platers and structural metal workers                                                                   | 46 (1,231)      | 1.10 (0.82, 1.47)        | 41 (1,134)      | 1.10 (0.81, 1.49)        | 5 (97)          | 1.10 (0.46, 2.65)        |
| [8339] Metal shaping and forming occupations, except machining, n.e.c.                                                      | 146 (4,073)     | 1.04 (0.89, 1.23)        | 116 (3,543)     | 1.01 (0.84, 1.21)        | 30 (530)        | 1.21 (0.85, 1.74)        |
| <i>[835] Wood Machining Occupations</i>                                                                                     | 52 (1,634)      | 0.92 (0.70, 1.21)        | 45 (1,419)      | 0.96 (0.72, 1.29)        | 7 (215)         | 0.69 (0.33, 1.45)        |
| [8350] Foremen: wood machining occupations                                                                                  | <5 (92)         | -                        | -               | -                        | -               | -                        |
| [8355] Planing, turning, shaping and related wood machining occupations                                                     | 51 (1,542)      | 0.95 (0.73, 1.26)        | 44 (1,339)      | 1.00 (0.74, 1.34)        | 7 (203)         | 0.73 (0.35, 1.53)        |
| <i>[837/839] Other Machining and Related Occupations</i>                                                                    | 48 (981)        | <b>1.40 (1.06, 1.86)</b> | 42 (828)        | <b>1.54 (1.14, 2.08)</b> | 6 (153)         | 0.83 (0.37, 1.84)        |
| [8391] Engravers, etchers and related occupations                                                                           | 18 (382)        | 1.39 (0.87, 2.20)        | -               | -                        | -               | -                        |
| [8395] Patternmakers and mouldmakers, n.e.c.                                                                                | 17 (332)        | 1.47 (0.91, 2.37)        | -               | -                        | -               | -                        |
| [8396] Inspecting, testing, grading and sampling occupations, machining, n.e.c.                                             | 13 (267)        | 1.34 (0.78, 2.31)        | -               | -                        | -               | -                        |
| <b>[85] Product fabricating, assembling and repairing occupations</b>                                                       | 2,140 (56,646)  | <b>1.07 (1.03, 1.12)</b> | 1,577 (46,079)  | <b>1.05 (1.00, 1.11)</b> | 563 (10,567)    | <b>1.14 (1.05, 1.24)</b> |
| <i>[853] Fabricating Assembling Installing and Repairing Occupations Electrical and Electronic and Related Equipment</i>    | 276 (7,571)     | 1.02 (0.91, 1.15)        | 194 (6,079)     | 0.96 (0.84, 1.11)        | 82 (1,492)      | 1.17 (0.95, 1.46)        |
| [8530] Foremen: fabricating, assembling, installing and repairing occupations, electrical, electronic and related equipment | 23 (610)        | 1.11 (0.74, 1.67)        | -               | -                        | -               | -                        |
| [8531] Electrical equipment fabricating and assembling occupations                                                          | 73 (1,938)      | 0.99 (0.79, 1.25)        | 39 (1,313)      | 0.89 (0.65, 1.21)        | 34 (625)        | 1.16 (0.83, 1.63)        |
| [8533] Electrical and related equipment installing and repairing occupations, n.e.c.                                        | 63 (2,386)      | 0.80 (0.62, 1.02)        | -               | -                        | -               | -                        |
| [8535] Electronic and related equipment installing and repairing occupations, n.e.c.                                        | 117 (2,637)     | <b>1.20 (1.00, 1.44)</b> | 73 (1,888)      | 1.17 (0.93, 1.48)        | 44 (749)        | 1.26 (0.94, 1.69)        |

Table A2. Hazard Ratios for Dermatitis Among Occupation Groups

| Occupation Group*                                                                                                                      | Overall         |                   | Male            |                          | Female          |                   |
|----------------------------------------------------------------------------------------------------------------------------------------|-----------------|-------------------|-----------------|--------------------------|-----------------|-------------------|
|                                                                                                                                        | Cases (Workers) | HR† (95% CI)      | Cases (Workers) | HR‡ (95% CI)             | Cases (Workers) | HR‡ (95% CI)      |
| <i>[854] Fabricating Assembling and Repairing Occupations Wood Products</i>                                                            | 123 (3,210)     | 1.13 (0.95, 1.35) | 101 (2,871)     | 1.09 (0.90, 1.32)        | 22 (339)        | 1.39 (0.91, 2.11) |
| [8541] Cabinet and wood furniture makers                                                                                               | 78 (2,005)      | 1.15 (0.92, 1.43) | 64 (1,806)      | 1.09 (0.85, 1.40)        | 14 (199)        | 1.52 (0.90, 2.56) |
| [8549] Fabricating, assembling and repairing occupations, wood products, n.e.c.                                                        | 45 (1,205)      | 1.10 (0.82, 1.47) | 37 (1,065)      | 1.08 (0.79, 1.50)        | 8 (140)         | 1.21 (0.61, 2.42) |
| <i>[855/856] Fabricating Assembling and Repairing Occupations Textile Fur and Leather Products</i>                                     | 83 (1,663)      | 1.14 (0.92, 1.42) | 18 (440)        | 1.23 (0.78, 1.96)        | 65 (1,223)      | 1.14 (0.89, 1.46) |
| [8550] Foremen: fabricating, assembling and repairing occupations, textile, fur and leather products                                   | <5 (38)         | -                 | -               | -                        | -               | -                 |
| [8551] Patternmaking, marking and cutting occupations: textile, fur and leather products                                               | 14 (279)        | 1.28 (0.76, 2.17) | 6 (160)         | 1.13 (0.51, 2.51)        | 8 (119)         | 1.43 (0.72, 2.86) |
| [8561] Shoemaking and repairing occupations                                                                                            | <5 (11)         | -                 | -               | -                        | -               | -                 |
| [8562] Upholsterers                                                                                                                    | 10 (225)        | 1.23 (0.66, 2.29) | -               | -                        | -               | -                 |
| [8563] Sewing machine operators, textile and similar materials                                                                         | 50 (865)        | 1.25 (0.95, 1.65) | -               | -                        | -               | -                 |
| [8566] Inspecting, testing, grading and sampling occupations: fabricating, assembling and repairing, textile, fur and leather products | <5 (42)         | -                 | -               | -                        | -               | -                 |
| [8569] Fabricating, assembling and repairing occupations: textile, fur and leather products, n.e.c.                                    | 5 (203)         | 0.52 (0.22, 1.26) | 0 (14)          | -                        | 5 (189)         | 0.57 (0.24, 1.37) |
| <i>[857] Fabricating Assembling and Repairing Occupations Rubber Plastic and Related Products</i>                                      | 17 (321)        | 1.51 (0.94, 2.42) | 12 (261)        | 1.40 (0.80, 2.46)        | 5 (60)          | 1.82 (0.76, 4.38) |
| [8570] Foremen: fabricating, assembling and repairing occupations, rubber, plastic and related products                                | 17 (321)        | 1.51 (0.94, 2.42) | 12 (261)        | 1.40 (0.80, 2.46)        | 5 (60)          | 1.82 (0.76, 4.38) |
| <i>[858] Mechanics and Repairers Except Electrical</i>                                                                                 | 642 (20,775)    | 0.93 (0.86, 1.01) | 620 (20,226)    | 0.93 (0.86, 1.01)        | 22 (549)        | 0.84 (0.55, 1.28) |
| [8581] Motor vehicle mechanics and repairmen                                                                                           | 322 (11,601)    | 0.84 (0.76, 0.94) | 314 (11,318)    | 0.86 (0.77, 0.96)        | 8 (283)         | 0.59 (0.30, 1.18) |
| [8582] Aircraft mechanics and repairmen                                                                                                | 30 (659)        | 1.38 (0.97, 1.98) | 30 (639)        | <b>1.44 (1.01, 2.06)</b> | 0 (20)          | -                 |

Table A2. Hazard Ratios for Dermatitis Among Occupation Groups

| Occupation Group*                                                                                                      | Overall         |                          | Male            |                          | Female          |                          |
|------------------------------------------------------------------------------------------------------------------------|-----------------|--------------------------|-----------------|--------------------------|-----------------|--------------------------|
|                                                                                                                        | Cases (Workers) | HR <sup>†</sup> (95% CI) | Cases (Workers) | HR <sup>‡</sup> (95% CI) | Cases (Workers) | HR <sup>‡</sup> (95% CI) |
| [8583] Rail transport equipment mechanics and repairmen                                                                | 12 (153)        | <b>2.42 (1.37, 4.25)</b> | 12 (150)        | <b>2.46 (1.40, 4.32)</b> | 0 (3)           | -                        |
| [8584] Industrial, farm and construction machinery mechanics and repairmen                                             | 255 (7,764)     | 0.98 (0.87, 1.11)        | 244 (7,561)     | 0.96 (0.85, 1.09)        | 11 (203)        | 1.16 (0.64, 2.08)        |
| [8588] Precision instrument mechanics and repairmen                                                                    | 5 (131)         | 1.15 (0.48, 2.77)        | 5 (126)         | 1.21 (0.50, 2.90)        | 0 (5)           | -                        |
| [8589] Mechanics and repairmen, except electrical, n.e.c.                                                              | 18 (467)        | 1.14 (0.72, 1.81)        | -               | -                        | -               | -                        |
| <i>[859] Other Product Fabricating Assembling and Repairing Occupations</i>                                            | 469 (10,691)    | <b>1.19 (1.09, 1.31)</b> | 313 (7,651)     | <b>1.25 (1.12, 1.40)</b> | 156 (3,040)     | 1.09 (0.93, 1.28)        |
| [8590] Foremen: product fabricating, assembling and repairing occupations, n.e.c.                                      | 18 (450)        | 1.12 (0.70, 1.77)        | -               | -                        | -               | -                        |
| [8592] Marine craft fabricating, assembling and repairing occupations                                                  | <5 (50)         | -                        | -               | -                        | -               | -                        |
| [8593] Paper product fabricating and assembling occupations                                                            | 28 (790)        | 0.97 (0.67, 1.41)        | 20 (613)        | 0.97 (0.63, 1.51)        | 8 (177)         | 0.96 (0.48, 1.92)        |
| [8595] Painting and decorating occupations, except construction                                                        | 78 (1,659)      | <b>1.33 (1.07, 1.67)</b> | 61 (1,388)      | <b>1.32 (1.03, 1.70)</b> | 17 (271)        | 1.34 (0.83, 2.15)        |
| [8599] Other product fabricating, assembling and repairing occupations, n.e.c.                                         | 343 (7,720)     | <b>1.19 (1.07, 1.33)</b> | 217 (5,230)     | <b>1.27 (1.11, 1.46)</b> | 126 (2,490)     | 1.08 (0.90, 1.28)        |
| <b>[87] Construction trades occupations</b>                                                                            | 1,358 (49,560)  | <i>0.82 (0.77, 0.87)</i> | 1,308 (48,413)  | <i>0.82 (0.77, 0.87)</i> | 50 (1,147)      | 0.93 (0.70, 1.22)        |
| <i>[871] Excavating Grading Paving and Related Occupations</i>                                                         | 92 (3,566)      | <i>0.77 (0.63, 0.95)</i> | -               | -                        | -               | -                        |
| [8710] Foremen: excavating, grading, paving and related occupations                                                    | 10 (473)        | 0.64 (0.34, 1.18)        | 10 (460)        | 0.65 (0.35, 1.20)        | 0 (13)          | -                        |
| [8711] Excavating, grading and related occupations                                                                     | 69 (2,804)      | <i>0.74 (0.58, 0.93)</i> | -               | -                        | -               | -                        |
| [8715] Railway sectionmen and trackmen                                                                                 | 13 (289)        | 1.36 (0.79, 2.35)        | -               | -                        | -               | -                        |
| <i>[873] Electrical Power Lighting and Wire Communications Equipment Erecting Installing and Repairing Occupations</i> | 256 (7,532)     | 1.03 (0.91, 1.17)        | 240 (7,309)     | 1.01 (0.89, 1.14)        | 16 (223)        | 1.54 (0.94, 2.51)        |

Table A2. Hazard Ratios for Dermatitis Among Occupation Groups

| Occupation Group*                                                                                                           | Overall         |                          | Male            |                          | Female          |                          |
|-----------------------------------------------------------------------------------------------------------------------------|-----------------|--------------------------|-----------------|--------------------------|-----------------|--------------------------|
|                                                                                                                             | Cases (Workers) | HR <sup>†</sup> (95% CI) | Cases (Workers) | HR <sup>‡</sup> (95% CI) | Cases (Workers) | HR <sup>‡</sup> (95% CI) |
| [8730] Foremen: electrical power, lighting and wire communications equipment erecting, installing and repairing occupations | 17 (493)        | 1.03 (0.64, 1.66)        | -               | -                        | -               | -                        |
| [8733] Construction electricians and repairmen                                                                              | 137 (3,995)     | 1.05 (0.89, 1.24)        | -               | -                        | -               | -                        |
| [8735] Wire communications and related equipment installing and repairing occupations                                       | 74 (2,289)      | 0.97 (0.77, 1.22)        | 67 (2,183)      | 0.94 (0.74, 1.20)        | 7 (106)         | 1.41 (0.67, 2.96)        |
| [8739] Electrical power, lighting and wire communications equipment erecting, installing and repairing occupations, n.e.c.  | 28 (757)        | 1.11 (0.77, 1.61)        | -               | -                        | -               | -                        |
| <i>[878/879] Other Construction Trades Occupations</i>                                                                      | 1,010 (38,462)  | 0.79 (0.74, 0.84)        | 980 (37,641)    | 0.79 (0.74, 0.85)        | 30 (821)        | 0.78 (0.54, 1.11)        |
| [8780] Foremen: other construction trades occupations                                                                       | 34 (1,569)      | 0.65 (0.47, 0.91)        | -               | -                        | -               | -                        |
| [8781] Carpenters and related occupations                                                                                   | 136 (5,715)     | 0.73 (0.62, 0.86)        | -               | -                        | -               | -                        |
| [8782] Brick and stone masons and tile setters                                                                              | 30 (1,260)      | 0.73 (0.51, 1.04)        | 30 (1,250)      | 0.73 (0.51, 1.04)        | 0 (10)          | -                        |
| [8783] Concrete finishing and related occupations                                                                           | 12 (527)        | 0.70 (0.40, 1.23)        | 12 (524)        | 0.70 (0.40, 1.23)        | 0 (3)           | -                        |
| [8784] Plasterers and related occupations                                                                                   | 50 (1,544)      | 0.99 (0.75, 1.30)        | -               | -                        | -               | -                        |
| [8785] Painters, paperhangers and related occupations                                                                       | 46 (1,257)      | 1.09 (0.82, 1.46)        | -               | -                        | -               | -                        |
| [8786] Insulating occupations, construction                                                                                 | 6 (327)         | 0.57 (0.26, 1.27)        | 6 (316)         | 0.60 (0.27, 1.33)        | 0 (11)          | -                        |
| [8787] Roofing, waterproofing and related occupations                                                                       | 34 (1,586)      | 0.67 (0.48, 0.94)        | 34 (1,573)      | 0.69 (0.49, 0.96)        | 0 (13)          | -                        |
| [8791] Pipefitting, plumbing and related occupations                                                                        | 109 (3,497)     | 0.95 (0.79, 1.15)        | -               | -                        | -               | -                        |
| [8793] Structural metal erectors                                                                                            | 20 (618)        | 0.99 (0.64, 1.54)        | 20 (611)        | 1.01 (0.65, 1.57)        | 0 (7)           | -                        |
| [8795] Glaziers                                                                                                             | 15 (587)        | 0.78 (0.47, 1.30)        | -               | -                        | -               | -                        |
| [8796] Inspecting, testing, grading and sampling occupations, construction, except electrical                               | 9 (302)         | 0.87 (0.45, 1.67)        | -               | -                        | -               | -                        |
| [8799] Other construction trades occupations, n.e.c.                                                                        | 509 (19,675)    | 0.79 (0.72, 0.86)        | 494 (19,269)    | 0.80 (0.73, 0.87)        | 15 (406)        | 0.79 (0.47, 1.30)        |
| <b>[91] Transport equipment operating occupations</b>                                                                       | 1,309 (40,639)  | 0.93 (0.88, 0.99)        | 1,097 (36,175)  | 0.91 (0.85, 0.97)        | 212 (4,464)     | 1.02 (0.89, 1.16)        |

Table A2. Hazard Ratios for Dermatitis Among Occupation Groups

| Occupation Group*                                                          | Overall         |                          | Male            |                          | Female          |                          |
|----------------------------------------------------------------------------|-----------------|--------------------------|-----------------|--------------------------|-----------------|--------------------------|
|                                                                            | Cases (Workers) | HR <sup>†</sup> (95% CI) | Cases (Workers) | HR <sup>‡</sup> (95% CI) | Cases (Workers) | HR <sup>‡</sup> (95% CI) |
| <i>[911] Air Transport Operating Occupations</i>                           | 128 (3,183)     | 1.18 (0.99, 1.40)        | 101 (2,739)     | 1.16 (0.96, 1.41)        | 27 (444)        | 1.31 (0.90, 1.91)        |
| [9111] Air pilots, navigators and flight engineers                         | 6 (221)         | 0.81 (0.37, 1.81)        | -               | -                        | -               | -                        |
| [9113] Air transport operating support occupations                         | <5 (33)         | -                        | -               | -                        | -               | -                        |
| [9119] Air transport operating occupations, n.e.c.                         | 120 (2,929)     | <b>1.20 (1.00, 1.44)</b> | 94 (2,512)      | 1.18 (0.96, 1.45)        | 26 (417)        | 1.34 (0.92, 1.97)        |
| <i>[913] Railway Transport Operating Occupations</i>                       | 26 (802)        | 0.95 (0.65, 1.39)        | -               | -                        | -               | -                        |
| [9130] Foremen: railway transport operating occupations                    | <5 (57)         | -                        | -               | -                        | -               | -                        |
| [9131] Locomotive engineers and firemen                                    | 10 (220)        | 1.35 (0.72, 2.50)        | 10 (216)        | 1.34 (0.72, 2.50)        | 0 (4)           | -                        |
| [9133] Conductors and brakemen, railway                                    | 8 (274)         | 0.84 (0.42, 1.68)        | -               | -                        | -               | -                        |
| [9135] Railway transport operating support occupations                     | 6 (252)         | 0.70 (0.32, 1.56)        | 6 (233)         | 0.77 (0.35, 1.72)        | 0 (19)          | -                        |
| <i>[915] Water Transport Operating Occupations</i>                         | 19 (474)        | 1.16 (0.74, 1.82)        | -               | -                        | -               | -                        |
| [9151] Deck officers                                                       | <5 (74)         | -                        | -               | -                        | -               | -                        |
| [9153] Engineering officers, ship                                          | <5 (59)         | -                        | -               | -                        | -               | -                        |
| [9155] Deck crew, ship                                                     | 9 (201)         | 1.33 (0.69, 2.56)        | 9 (181)         | 1.55 (0.81, 2.97)        | 0 (20)          | -                        |
| [9159] Water transport operating occupations, n.e.c.                       | <5 (93)         | -                        | -               | -                        | -               | -                        |
| <i>[9170/1/3/9] Other Motor Transport Operating Occupations</i>            | 194 (6,124)     | 0.93 (0.81, 1.07)        | 176 (5,578)     | 0.96 (0.83, 1.11)        | 18 (546)        | 0.70 (0.44, 1.11)        |
| [9170] Foremen: motor transport operating occupations                      | 10 (215)        | 1.35 (0.73, 2.51)        | 5 (188)         | 0.80 (0.34, 1.91)        | 5 (27)          | <b>4.22 (1.76, 10.1)</b> |
| [9173] Taxi drivers and chauffeurs                                         | 9 (247)         | 1.02 (0.53, 1.95)        | -               | -                        | -               | -                        |
| [9179] Motor transport operating occupations, n.e.c.                       | 175 (5,662)     | 0.91 (0.79, 1.06)        | 164 (5,206)     | 0.96 (0.82, 1.12)        | 11 (456)        | 0.51 (0.28, 0.92)        |
| <i>[9175] Truck Drivers</i>                                                | 592 (22,022)    | 0.79 (0.73, 0.86)        | 553 (21,081)    | 0.78 (0.71, 0.85)        | 39 (941)        | 0.88 (0.64, 1.20)        |
| [9175] Truck Drivers                                                       | 592 (22,022)    | 0.79 (0.73, 0.86)        | 553 (21,081)    | 0.78 (0.71, 0.85)        | 39 (941)        | 0.88 (0.64, 1.20)        |
| <i>[919] Other Transport and Related Equipment Operating Occupations</i>   | 351 (8,035)     | <b>1.18 (1.06, 1.31)</b> | 227 (5,610)     | <b>1.22 (1.07, 1.39)</b> | 124 (2,425)     | 1.10 (0.92, 1.31)        |
| [9199] Other transport and related equipment operating occupations, n.e.c. | 351 (8,035)     | <b>1.18 (1.06, 1.31)</b> | 227 (5,610)     | <b>1.22 (1.07, 1.39)</b> | 124 (2,425)     | 1.10 (0.92, 1.31)        |



Table A2. Hazard Ratios for Dermatitis Among Occupation Groups

| Occupation Group*                                                                          | Overall         |                          | Male            |                   | Female          |                   |
|--------------------------------------------------------------------------------------------|-----------------|--------------------------|-----------------|-------------------|-----------------|-------------------|
|                                                                                            | Cases (Workers) | HR† (95% CI)             | Cases (Workers) | HR‡ (95% CI)      | Cases (Workers) | HR‡ (95% CI)      |
| <b>[93] Materials handling and related occupations, n.e.c.</b>                             | 908 (25,290)    | 1.03 (0.96, 1.10)        | 674 (20,734)    | 1.01 (0.93, 1.09) | 234 (4,556)     | 1.10 (0.97, 1.25) |
| <i>[931] Material Handling and Related Occupations NEC</i>                                 | 908 (25,290)    | 1.03 (0.96, 1.10)        | 674 (20,734)    | 1.01 (0.93, 1.09) | 234 (4,556)     | 1.10 (0.97, 1.25) |
| [9310] Foremen: materials handling and related occupations, n.e.c.                         | <5 (48)         | -                        | -               | -                 | -               | -                 |
| [9311] Hoisting occupations, n.e.c.                                                        | 16 (703)        | 0.69 (0.42, 1.12)        | 16 (686)        | 0.70 (0.43, 1.15) | 0 (17)          | -                 |
| [9313] Longshoremen, stevedores and freight handlers                                       | 14 (608)        | 0.70 (0.41, 1.18)        | -               | -                 | -               | -                 |
| [9318] Occupations in labouring and other elemental work, materials handling               | 877 (23,931)    | 1.05 (0.98, 1.12)        | 644 (19,434)    | 1.03 (0.95, 1.11) | 233 (4,497)     | 1.11 (0.97, 1.26) |
| <b>[95] Other crafts and equipment operating occupations</b>                               | 157 (3,668)     | <b>1.19 (1.02, 1.39)</b> | 107 (2,850)     | 1.13 (0.93, 1.36) | 50 (818)        | 1.31 (0.99, 1.73) |
| <i>[951] Printing and Related Occupations</i>                                              | 100 (2,413)     | 1.13 (0.93, 1.37)        | 62 (1,777)      | 1.05 (0.81, 1.34) | 38 (636)        | 1.28 (0.93, 1.76) |
| [9510] Foremen: printing and related occupations                                           | <5 (98)         | -                        | -               | -                 | -               | -                 |
| [9511] Typesetters and compositors                                                         | <5 (42)         | -                        | -               | -                 | -               | -                 |
| [9512] Printing press occupations                                                          | 36 (1,022)      | 1.01 (0.73, 1.40)        | 30 (898)        | 0.99 (0.69, 1.42) | 6 (124)         | 1.02 (0.46, 2.26) |
| [9515] Photoengravers and related occupations                                              | 7 (131)         | 1.47 (0.70, 3.08)        | -               | -                 | -               | -                 |
| [9517] Bookbinders and related occupations                                                 | 26 (565)        | 1.18 (0.81, 1.74)        | 12 (340)        | 1.06 (0.60, 1.87) | 14 (225)        | 1.32 (0.78, 2.23) |
| [9519] Printing and related occupations, n.e.c.                                            | 26 (555)        | 1.24 (0.85, 1.82)        | 14 (358)        | 1.18 (0.70, 1.99) | 12 (197)        | 1.33 (0.76, 2.34) |
| <i>[953] Stationary Engine and Utilities Equipment Operating and Related Occupations</i>   | 45 (999)        | 1.33 (0.99, 1.78)        | 40 (919)        | 1.31 (0.96, 1.79) | 5 (80)          | 1.34 (0.56, 3.21) |
| [9531] Power station operators                                                             | 7 (200)         | 1.00 (0.48, 2.09)        | -               | -                 | -               | -                 |
| [9539] Stationary engine and utilities equipment operating and related occupations, n.e.c. | 38 (799)        | <b>1.42 (1.03, 1.95)</b> | -               | -                 | -               | -                 |
| <i>[955/959] Other Crafts and Equipment Operating Occupations NEC</i>                      | 12 (256)        | 1.24 (0.70, 2.18)        | 5 (154)         | 1.00 (0.42, 2.41) | 7 (102)         | 1.48 (0.71, 3.10) |
| [9551] Radio and television broadcasting equipment operators                               | <5 (26)         | -                        | -               | -                 | -               | -                 |
| [9555] Sound recording and reproduction equipment operators                                | <5 (107)        | -                        | -               | -                 | -               | -                 |
| [9591] Photographic processing occupations                                                 | 6 (123)         | 1.16 (0.52, 2.59)        | -               | -                 | -               | -                 |

Table A2. Hazard Ratios for Dermatitis Among Occupation Groups

| Occupation Group*                                 | Overall         |                   | Male            |                   | Female          |                   |
|---------------------------------------------------|-----------------|-------------------|-----------------|-------------------|-----------------|-------------------|
|                                                   | Cases (Workers) | HR† (95% CI)      | Cases (Workers) | HR‡ (95% CI)      | Cases (Workers) | HR‡ (95% CI)      |
| <b>[99] Occupation not elsewhere classified</b>   | 1,303 (36,375)  | 1.01 (0.96, 1.07) | 908 (28,175)    | 1.02 (0.95, 1.09) | 395 (8,200)     | 1.03 (0.93, 1.14) |
| <i>[991] Occupations Not Elsewhere Classified</i> | 1,303 (36,375)  | 1.01 (0.96, 1.07) | 908 (28,175)    | 1.02 (0.95, 1.09) | 395 (8,200)     | 1.03 (0.93, 1.14) |
| [9918] Labourers, N.E.C.                          | 1,303 (36,375)  | 1.01 (0.96, 1.07) | 908 (28,175)    | 1.02 (0.95, 1.09) | 395 (8,200)     | 1.03 (0.93, 1.14) |

\*[CCDO 1971] Occupation Major Group

[CCDO 1971] Occupation Minor Group

[CCDO 1971] Occupation Unit Group

Definition of abbreviations: HR=hazard ratio, CI=confidence interval, NEC=not elsewhere classified

Dashes indicate suppression of results for groups with <5 cases

Statistically significant ( $\alpha=0.05$  level) increased risks are bolded and statistically significant decreased risks are italicized

† The risk of dermatitis in a particular group relative to all other workers in the cohort, adjusted for birth year and sex

‡ The sex-specific risk of dermatitis among a particular group relative to all other workers of that sex, adjusted for birth year

Table A3. Hazard Ratios for Dermatitis Among Exposure Agents derived from Occupational Asthma-specific Job Exposure Matrix

| Exposure Agents                                   | Overall Exposure |                          | Medium Exposure |                          | High Exposure   |                          |
|---------------------------------------------------|------------------|--------------------------|-----------------|--------------------------|-----------------|--------------------------|
|                                                   | Cases (Workers)  | HR* (95% CI)             | Cases (Workers) | HR† (95% CI)             | Cases (Workers) | HR‡ (95% CI)             |
| HMW - Animal                                      | 138 (5,258)      | 0.71 (0.60, 0.84)        | 137 (5,205)     | 0.71 (0.60, 0.84)        | -               | -                        |
| HMW - Fish/Shellfish                              | 504 (13,450)     | 1.01 (0.92, 1.10)        | 502 (13,404)    | 1.01 (0.92, 1.10)        | -               | -                        |
| HMW - Flour                                       | 483 (12,909)     | 0.99 (0.91, 1.08)        | 414 (11,102)    | 1.00 (0.91, 1.10)        | 69 (1,807)      | 0.93 (0.73, 1.17)        |
| HMW - Other Foods (milk, eggs)                    | 483 (12,909)     | 0.99 (0.91, 1.08)        | 483 (12,909)    | 0.99 (0.91, 1.08)        | -               | -                        |
| HMW - Other Plants                                | 348 (11,671)     | 0.85 (0.76, 0.94)        | 140 (5,614)     | 0.70 (0.59, 0.83)        | 208 (6,057)     | 0.99 (0.86, 1.13)        |
| HMW Mite and Insect - Storage                     | 199 (6,858)      | 0.76 (0.66, 0.88)        | 199 (6,858)     | 0.76 (0.66, 0.88)        | -               | -                        |
| HMW Mite and Insect - Plants                      | 347 (11,645)     | 0.85 (0.76, 0.94)        | 139 (5,588)     | 0.70 (0.59, 0.83)        | 208 (6,057)     | 0.99 (0.86, 1.13)        |
| HMW - Enzymes                                     | 483 (12,909)     | 0.99 (0.91, 1.08)        | 483 (12,909)    | 0.99 (0.91, 1.08)        | -               | -                        |
| HMW - Latex                                       | 1,615 (39,273)   | 0.89 (0.85, 0.94)        | 1144 (26,941)   | 0.94 (0.88, 0.99)        | 471 (12,332)    | 0.81 (0.74, 0.89)        |
| HMW Microbial Irritants - Textile Dusts           | 126 (2,745)      | 1.11 (0.93, 1.32)        | 115 (2,427)     | 1.14 (0.95, 1.37)        | 11 (318)        | 0.84 (0.47, 1.52)        |
| Microbial Irritants - Molds Fungi                 | 428 (14,122)     | 0.85 (0.77, 0.94)        | 428 (14,122)    | 0.85 (0.77, 0.94)        | -               | -                        |
| Microbial Irritants - Endotoxin                   | 394 (13,021)     | 0.85 (0.77, 0.93)        | 363 (12,222)    | 0.84 (0.76, 0.93)        | 31 (799)        | 0.92 (0.65, 1.31)        |
| HMW or LMW - Pharmaceutical Drugs                 | 18 (397)         | 1.11 (0.70, 1.76)        | 18 (397)        | 1.11 (0.70, 1.76)        | -               | -                        |
| LMW Irritants - High-level Chemical Disinfectants | 1,799 (44,420)   | 0.89 (0.85, 0.94)        | 1,799 (44,420)  | 0.89 (0.85, 0.94)        | -               | -                        |
| LMW Irritants - Aliphatic Amines                  | 528 (13,134)     | <b>1.17 (1.07, 1.28)</b> | 259 (6,126)     | <b>1.21 (1.07, 1.37)</b> | 269 (7,008)     | <b>1.13 (1.00, 1.27)</b> |
| LMW Irritants - Isocyanates                       | 239 (6,737)      | 1.05 (0.93, 1.20)        | 161 (5,079)     | 0.96 (0.82, 1.12)        | 78 (1,658)      | <b>1.33 (1.06, 1.66)</b> |
| LMW Irritants - Acrylates                         | 258 (6,795)      | 1.12 (0.99, 1.26)        | 258 (6,795)     | 1.12 (0.99, 1.26)        | -               | -                        |
| LMW Irritants - Epoxy Resins                      | 822 (24,285)     | 0.99 (0.92, 1.06)        | 301 (7,377)     | <b>1.12 (1.00, 1.26)</b> | 521 (16,908)    | 0.93 (0.85, 1.01)        |
| LMW Irritants - Persulfate and Henna              | 25 (376)         | <b>1.48 (1.00, 2.19)</b> | -               | -                        | 25 (376)        | <b>1.48 (1.00, 2.19)</b> |
| LMW Irritants - Wood Dusts                        | 397 (14,050)     | 0.84 (0.76, 0.93)        | 251 (9,660)     | 0.78 (0.69, 0.89)        | 146 (4,390)     | 0.96 (0.81, 1.13)        |
| LMW Irritants - Metal and Metal Fumes             | 2,895 (80,550)   | <b>1.05 (1.01, 1.09)</b> | 2,447 (67,491)  | <b>1.05 (1.01, 1.10)</b> | 448 (13,059)    | 1.03 (0.93, 1.13)        |
| LMW Irritants - Metal Working Fluids              | 796 (20,026)     | <b>1.16 (1.08, 1.24)</b> | 49 (1,515)      | 0.98 (0.74, 1.29)        | 747 (18,511)    | <b>1.17 (1.09, 1.26)</b> |
| Irritants - Herbicides                            | 375 (12,652)     | 0.84 (0.76, 0.93)        | 260 (7,838)     | 0.95 (0.84, 1.08)        | 115 (4,814)     | 0.67 (0.56, 0.80)        |
| Irritants - Insecticides                          | 384 (12,905)     | 0.83 (0.75, 0.92)        | 67 (2,224)      | 0.81 (0.63, 1.02)        | 317 (10,681)    | 0.84 (0.75, 0.94)        |
| Irritants - Fungicides                            | 781 (22,255)     | 0.99 (0.92, 1.06)        | 464 (11,574)    | <b>1.12 (1.02, 1.23)</b> | 317 (10,681)    | 0.84 (0.75, 0.94)        |
| Irritants - Indoor Cleaning Products              | 3,939 (96,659)   | 0.96 (0.93, 0.99)        | 2,928 (71,931)  | 0.98 (0.94, 1.02)        | 1,011 (24,728)  | 0.90 (0.84, 0.96)        |

Table A3. Hazard Ratios for Dermatitis Among Exposure Agents derived from Occupational Asthma-specific Job Exposure Matrix

| Exposure Agents              | Overall Exposure |                          | Medium Exposure |                          | High Exposure   |                          |
|------------------------------|------------------|--------------------------|-----------------|--------------------------|-----------------|--------------------------|
|                              | Cases (Workers)  | HR* (95% CI)             | Cases (Workers) | HR† (95% CI)             | Cases (Workers) | HR‡ (95% CI)             |
| Irritants - Bleach           | 2,459 (62,206)   | <i>0.90 (0.87, 0.94)</i> | 1,448 (37,478)  | <i>0.91 (0.86, 0.96)</i> | 1,011 (24,728)  | <i>0.89 (0.84, 0.96)</i> |
| Irritants - Organic Solvents | 3,055 (83,310)   | <b>1.05 (1.01, 1.09)</b> | 2,816 (77,763)  | 1.03 (0.99, 1.08)        | 239 (5,547)     | <b>1.21 (1.06, 1.37)</b> |
| Irritants - Exhaust Fumes    | 3,292 (109,820)  | <i>0.85 (0.82, 0.88)</i> | 1,803 (58,224)  | <i>0.86 (0.82, 0.91)</i> | 1,489 (51,596)  | <i>0.83 (0.78, 0.87)</i> |

\*The risk of dermatitis for all occupations with exposure to a particular agent compared to occupations with no exposure

†The risk of dermatitis for all occupations with medium exposure to a particular agent compared to occupations with no exposure

‡The risk of dermatitis for all occupations with high exposure to a particular agent compared to occupations with no exposure

Definition of abbreviations: HR=hazard ratio, CI=confidence interval, NEC=not elsewhere classified

Dashes indicate suppression of results for groups with <5 cases

Statistically significant ( $\alpha=0.05$  level) increased risks are bolded and statistically significant decreased risks are italicized
